# Supplementary material for: NMR-based newborn urine screening for optimized detection of inherited errors of metabolism
Source: PubMed Central journal article supplement (PMC6736868; doi:10.1038/s41598-019-49685-x), 2019-09-10
Supplement: 41598_2019_49685_MOESM1_ESM.pdf [file 41598_2019_49685_MOESM1_ESM.pdf]

**Supplementary material for:**

## **NMR-based newborn urine screening for an optimized premature detection of inherited errors of metabolism**

Nieves Embade<sup>1</sup>, Claire Cannet<sup>2</sup>, Tammo Diercks<sup>3</sup>, Rubén Gil-Redondo<sup>1</sup>, Chiara Bruzzone<sup>1</sup>, Sara Ansó<sup>4</sup>, Lourdes Román Echevarría<sup>4</sup>, M. Mercedes Martínez Ayucar<sup>5</sup>, Laura Collazos<sup>5</sup>, Blanca Lodoso<sup>5</sup>, Eneritz Guerra<sup>4</sup>, Izaskun Asla Elorriaga<sup>4</sup>, Miguel Ángel Kortajarena<sup>6</sup>, Alberto Pérez Legorburu<sup>7</sup>, Fang Fang<sup>2</sup>, Itziar Astigarraga<sup>4</sup>, Hartmut Schäfer<sup>2</sup>, Manfred Spraul<sup>2</sup>, and Oscar Millet<sup>1,\*</sup>

<sup>1</sup>Protein Stability and Inherited Disease Laboratory, CIC bioGUNE, Bizkaia Technology Park, Bld. 800, 48160 Derio, Bizkaia, Spain.

<sup>2</sup>Bruker Biospin GmbH, Silberstreifen, 76287 Rheinstetten, Germany.

<sup>3</sup>NMR Platform, CIC bioGUNE, Bizkaia Technology Park, Bld. 800, 48160 Derio, Bizkaia, Spain.

<sup>4</sup>Department of Pediatrics, Cruces University Hospital, Barakaldo, Spain.

<sup>5</sup>Department of Pediatrics, Txagorritxu Hospital, Vitoria-Gasteiz, Spain.

<sup>7</sup>Department of Nursing, University of the Basque Country, Donostia, Gipuzkoa, Spain.

<sup>8</sup>Department of Pediatrics, Basurto University Hospital, Bilbao, Spain.

### **Contents:**

Supplementary Materials and Methods.

Table S1. Clinical metadata of the Studied Newborn Population.

Figure S1. PCA analysis for AVANCE 600 MHz spectrometer versus IVDr 600 spectrometer in urine samples.

Figure S2. Different types of metabolites found out in the spectra.

Figure S3. Two-dimensional PLS-DA score plot urine samples.

Table S2. LOD values, GEV distribution values, quartiles, normal and pathogenic values for the 150 metabolites under consideration.

Figure S4. Distribution of probability densities for 22 out of the 66 metabolites that had a percentage of detection greater or equal 2.5%.

Figure S5. Distribution of probability densities for 22 out of the 66 metabolites that had a percentage of detection greater or equal 2.5%.

Figure S6. Distribution of probability densities for 22 out of the 66 metabolites that had a percentage of detection greater or equal 2.5%.

## Supplementary Materials and Methods

**Study design.** Urine samples were collected from 470 individuals that were born in one of the four public hospitals of the Basque Country with neonatology units: Cruces (Barakaldo, Bizkaia), Txagorritxu (Vitoria, Araba), Basurto (Bilbao, Bizkaia) and Donostia (Donostia, Guipuzkoa). Samples were codified and anonymized to protect the confidentiality of individual participants. Metadata such as date of birth, gestational age, gender, weight, length, head circumference, newborn lifetime at sampling and feeding type was included for the majority of the donors. Neonates, with clinical symptoms of any disease were not considered in the study.

To minimize variation and to achieve maximal reproducibility, we followed strict standard operating protocols (SOPs) for the whole duration of the study. All materials used in the hospitals for urine collection and handling belonged to the same brand and lot number. Urine was collected from cotton balls inserted into the diapers which were subsequently extracted from the cotton balls by placing them into the syringe barrel, inserting the plunger and squeezing out the absorbed urine into a 15 mL Falcon tube (Roberts and Lucas 1985). The obtained urine was aliquoted into 1.5 mL Eppendorf tubes and stored at  $-80^{\circ}\text{C}$  until NMR analysis. To avoid contamination of material from diapers or cotton ball (Goodpaster et al 2011) we also collected samples from diapers and cotton balls, soaked with water for different times (1h to 6h) and temperatures (RT versus  $37^{\circ}\text{C}$ ). The absorbed liquid samples were measured following the same procedure as for the newborn urine.

**NMR sample Preparation.** On the day of analysis, frozen urine samples were left to thaw to room temperature for 30 min and then centrifuged at 6000 rpm for 5 min at  $4^{\circ}\text{C}$ . An aliquot of 630  $\mu\text{L}$  was transferred into a 1.5 mL microcentrifuge tube without swirling up any sediment from the bottom of the original tube to avoid contamination of the NMR sample by sedimentation, which might occur during centrifugation. Human urine covers a broad pH range and contains a variable amount of ionic species that can affect the NMR chemical shifts of metabolites. To minimize the pH variation, we added 70  $\mu\text{L}$  of a phosphate buffer (1.5 M  $\text{KH}_2\text{PO}_4/\text{K}_2\text{HPO}_4$ , 2 mM  $\text{NaN}_3$ , 1% TSP in 70%  $\text{D}_2\text{O}$ , pH 7.4) to these samples that were then briefly vortexed. Finally, 600  $\mu\text{L}$  of each urine/buffer mixture was pipetted into a 5 mm Wilmad 507-PP-7 NMR tube with specified camber and excentricity (for high-resolution shimming) as well as sampled volume (for quantification).

**NMR measurements.** Samples were measured on two 600 MHz BRUKER spectrometers, both equipped with  $^1\text{H}$  (inverse) detecting room temperature probeheads with automatic tuning and matching unit: i) an AVANCE III with PA-TXI probehead with triple axis gradient coils and an automatic *SampleXpress* sample changer operating at room temperature (296 K), or ii) an AVANCE IIIHD (IVDr) with PA-BBI probehead with z-gradient coil and an automatic *SampleJet* sample changer operating at 278 K. All urine samples were prepared manually at 277 K in batches of 45 at a time to minimise formation of a concentration gradient inside the NMR tubes stored in the automatic sample changer (with a sampling rate of 3 – 4 per hour, this corresponded to maximal 12 hours waiting time for the last NMR sample loaded). These were then prepared for NMR measurements by the following automated steps: 1) loading the NMR tube into the magnet (with prior warming to 300 K in the *SampleJet*), 2) temperature (300 K) stabilisation during 5 minutes, 3) locking on the  $\text{D}_2\text{O}$  signal, 4) LOCK phase optimisation (only on the IVDr spectrometer), 5)  $^1\text{H}$  tuning and matching, 6) gradient shimming (z to z5), 7)  $^1\text{H}$   $90^{\circ}$  pulse length and 50 Hz presaturation power calibration (using a fast nutation experiment). As described below, two  $^1\text{H}$  NMR experiments were then measured per urine sample, each with selective water presaturation (50 Hz saturation power) during the interscan delay.

A high-resolution 1D  $^1\text{H}$  spectrum (BRUKER pulse sequence '*noesyphpr1d*', (Mackay 2011)) was acquired with 4 dummy (DS) and 32 accumulated (NS) scans, 4 s interscan delay (D1), 20 ppm spectral width (SW), 64K complex data points (TD) resulting in 2.7 s FID acquisition time (AQ) and 0.367 Hz FID resolution (1/AQ). The FID was then apodised with an exponential function (0.3 Hz linebroadening factor) and zero filled to 128K data points (SI) prior to Fourier transform. The obtained spectrum was automatically phase and baseline corrected, and referenced to the internal TSP signal (at 0.00 ppm). Finally, an artificial PULCON reference signal with an amplitude corresponding to 1 mM  $^1\text{H}$  concentration was added at 12 ppm (Wider and Dreier 2006) to enable a quantitative spectrum analysis.

A 2D  $J_{\text{HH}}$  resolved spectrum (BRUKER pulse sequence '*jresgpprf*') was acquired with DS = 16, NS = 2, D1 = 2 s, SW = 16.7 ppm, TD = 8K resulting in AQ = 0.41 s and 2.45 Hz FID resolution; the indirect  $J_{\text{HH}}$  dimension was sampled with a spectral width of 78 Hz and 40 data points (serial FIDs) resulting in 1.85 Hz resolution. The serial FIDs were then multiplied with a sine function for resolution enhancement and zero filled to SI = 16K in the direct and 256 in the indirect dimension prior to Fourier transform (in both dimensions). The obtained spectrum was processed in magnitude mode and tilted ( $45^{\circ}$ ) to construct a homodecoupled  $^1\text{H}$  spectrum by projection in the direct dimension.

Critical experimental parameters were verified and calibrated daily, prior to any screening experiment, using commercially available NMR standards. Thus, the NMR sampling temperature was calibrated to  $300 \pm 0.1$  K using a 99.8% deuterated pure methanol sample. The magnetic field homogeneity ('shim quality') was verified using a standard aqueous sucrose sample (2 mM, 4 cm filling height), and readjusted if the  $^1\text{H}$  signal linewidth of the included TMS was larger than 0.6 Hz (processed without FID apodisation). Using the same standard sample, the  $\text{H}_2\text{O}$  signal offset was calibrated by minimising the residual  $\text{H}_2\text{O}$  signal after 10 s presaturation at 50 Hz power, and the water suppression quality was verified using the SUPPCAL routine (BRUKER Biospin). Finally, an external quantification reference sample (QuantRef, BRUKER Biospin) was used to verify the stability of signal intensities (within  $\pm 2\%$

tolerance) and, if required, perform a recalibration for absolute spectra quantification by the PULCON principle (Wider and Dreier 2006).

**Metabolite quantification and determination of LODs.** Metabolite quantification was performed after spectra deconvolution and signal fitting using an in-house built simplex algorithm. The method is similar to the commercially available solutions and considers all the chemical and topological parameters that are constitutive of the metabolite: chemical shift, signal multiplicity due to homonuclear J-coupling, relative intensity due to the number of contributing protons and linebroadening due to relaxation. In addition, it also considers the Gauss/Lorentz ratio to adjust to the processing parameters. Gaussian/Lorentzian synthetic shapes were tested on the complex envelope function to fit the concentration of the metabolite. Fit examples for illustration of automated quantification approach in urine spectra can be found in Aygen *et al.* (Aygen *et al* 2014).

The limits-of-detection (LOD) for the different metabolites were determined as previously reported (REF) by using spiking experiments at growing concentrations of the reference metabolite. This procedure was repeated for all the samples in a representative set of at least 10 urines that captures the intrinsic variability of the urine sample.

**Untargeted analysis.** The <sup>1</sup>H-NMR spectra dataset, processed using Topspin (Bruker Biospin), was further analyzed using MestreNova software (v.7.0, Mestrelab Research S.L) and R (v.2.3-3, the R project for Statistical Computing). Each spectrum was segmented into consecutive buckets (bins) of fixed 0.01 ppm width in the region between 9.5 and 0.5 ppm and pertaining bin intensities were computed by dividing the bin integral by the bin width. Bins in the regions 4.5 to 5.0 ppm (residual water signal) and 5.4 to 6.0 (urea signal) were discarded, leaving a total of 790 bins  $[(9.5 - 0.5 - (5.0 - 4.5)) - (6.0 - 5.4)] \text{ ppm} / 0.01 \text{ ppm}$  for analysis. Bin intensities were then normalized to pertaining creatinine integral in order to minimize the effect of different urine concentrations, and subsequently *Pareto* scaled using MetaboAnalyst 4.0 (<http://www.metaboanalyst.ca>) (Chong *et al* 2018) to reduce bias from sample variability and preparation. No bin alignment was performed in any case.

**Targeted analysis and metabolic model build-up.** Concentrations for each metabolite were fitted to a generalized extreme value (GEV) distribution using a maximum-likelihood estimation (MLE) algorithm with Broyden–Fletcher–Goldfarb–Shanno (BFGS) optimization, as implemented in the “evd” R package (v.2.3-3). The number of available quantified values was small for some metabolites, while for others the modes were concentrated in very few discrete values, both of which reduces the MLE accuracy. Therefore, a bootstrapping strategy was implemented in combination with small random variation of the data: For each metabolite, 100 MLE calculations were performed, each with a different subset of 1000 values obtained from random sampling with replacement. A small random variation was applied to each value, between 0 and 0.2 times the minimum difference between 2 consecutive values. Finally, scale, location, and shape parameters were averaged over the 100 MLE casts.

**Sample outlier identification.** A combination of *multivariate* and *univariate* statistics was applied to classify samples as outliers. The multivariate analysis, based on DBSCAN (Ester *et al* 1996), used multivariate space (bins, corresponding to spectral sections of 0.01 ppm width) to identify sample groups with low density or isolated samples, marked then as extremes. The univariate analysis independently identified outlier bins and samples with at least 20% outlier bins were then marked as extremes. Input parameters for the DBSCAN clustering algorithm were set to 35 for the size of the epsilon neighborhood (eps) and to 50 for the number of minimum points in the eps region (minPts). In the univariate bin analysis, outlier values were assigned by the 1.5-times-interquartile-range (1.5IQR) rule, i.e. values greater than  $Q3 + 1.5IQR$  or lower than  $Q1 - 1.5IQR$  were marked as outlier.

## References

- Aygen S, Durr U, Hegele P, *et al* (2014) NMR-Based Screening for Inborn Errors of Metabolism: Initial Results from a Study on Turkish Neonates. *JIMD Rep* 16: 101-111.
- Chong J, Soufan O, Li C, *et al* (2018) MetaboAnalyst 4.0: towards more transparent and integrative metabolomics analysis. *Nucleic Acids Res* 46: W486-W494.
- Ester M, Kriegl HP, Sander J, Xu X (1996) A density-based algorithm for discovering clusters in large spatial databases with noise. *Proc Discov Data Mining*: 226-231.
- Goodpaster AM, Ramadas EH, Kennedy MA (2011) Potential effect of diaper and cotton ball contamination on NMR- and LC/MS-based metabolomics studies of urine from newborn babies. *Analytical chemistry* 83: 896-902.
- Mackay RT (2011) How the 1D-NOESY suppresses solvent signal in metabolomics NMR spectroscopy: an examination of the pulse sequence components and evolution. *Concepts in Magnetic Resonance Part A* 38A: 197-200.
- Roberts SB, Lucas A (1985) Measurement of urinary constituents and output using disposable napkins. *Arch Dis Child* 60: 1021-1024.
- Wider G, Dreier L (2006) Measuring protein concentrations by NMR spectroscopy. *Journal of the American Chemical Society* 128: 2571-2576.

**Table S1.** Clinical metadata of the Studied Newborn Population.

| Gender                                       |              | Male         | Female       |
|----------------------------------------------|--------------|--------------|--------------|
| <b>Number of samples</b>                     |              | 242          | 213          |
| <b>Hospital</b>                              | CRC          | 134 (55.37%) | 114 (53.52%) |
|                                              | HB           | 3 (1.24%)    | 5 (2.35%)    |
|                                              | HD           | 33 (13.64%)  | 40 (18.78%)  |
|                                              | TX           | 72 (29.75%)  | 54 (25.35%)  |
| <b>Ethnic group</b>                          | Asian        | 2 (0.83%)    | 2 (0.94%)    |
|                                              | Caucasian    | 202 (83.47%) | 176 (82.63%) |
|                                              | Hispanic     | 26 (10.74%)  | 24 (11.27%)  |
|                                              | Maghreb      | 10 (4.13%)   | 8 (3.76%)    |
|                                              | Black        | 1 (0.41%)    | 3 (1.41%)    |
|                                              | 'Missing'    | 1 (0.41%)    | 0 (0.00%)    |
| <b>Gestation term</b>                        | preterm      | 4 (1.65%)    | 1 (0.47%)    |
|                                              | early term   | 47 (19.42%)  | 46 (21.60%)  |
|                                              | full term    | 141 (58.26%) | 123 (57.75%) |
|                                              | late term    | 49 (20.25%)  | 42 (19.72%)  |
|                                              | 'Missing'    | 1 (0.41%)    | 1 (0.47%)    |
| <b>Weight at birth / g</b>                   | low (<3000g) | 42 (17.36%)  | 47 (22.07%)  |
|                                              | normal       | 200 (82.64%) | 166 (77.93%) |
| <b>Weight at collection / g</b>              | 2000-2500    | 5 (2.07%)    | 7 (3.29%)    |
|                                              | 2500-3000    | 61 (25.21%)  | 63 (29.58%)  |
|                                              | 3000-3500    | 120 (49.59%) | 105 (49.30%) |
|                                              | 3500-4000    | 49 (20.25%)  | 34 (15.96%)  |
|                                              | 4000-4500    | 6 (2.48%)    | 1 (0.47%)    |
|                                              | 'Missing'    | 1 (0.41%)    | 3 (1.41%)    |
| <b>Food type at collection day</b>           | artificial   | 25 (10.33%)  | 23 (10.80%)  |
|                                              | maternal     | 173 (71.49%) | 147 (69.01%) |
|                                              | mixed        | 43 (17.77%)  | 42 (19.72%)  |
|                                              | 'Missing'    | 1 (0.41%)    | 1 (0.47%)    |
| <b>Age at collection / days</b>              | 1            | 91 (37.60%)  | 88 (41.31%)  |
|                                              | 2            | 127 (52.48%) | 98 (46.01%)  |
|                                              | 3            | 11 (4.55%)   | 10 (4.69%)   |
|                                              | 4            | 4 (1.65%)    | 4 (1.88%)    |
|                                              | 'Missing'    | 9 (3.72%)    | 13 (6.10%)   |
| <b>Head Circumference at collection / cm</b> | 30-32        | 3 (1.24%)    | 11 (5.16%)   |
|                                              | 32-34        | 71 (29.34%)  | 93 (43.66%)  |
|                                              | 34-36        | 146 (60.33%) | 95 (44.60%)  |
|                                              | 36-38        | 21 (8.68%)   | 10 (4.69%)   |
|                                              | >38          | 1 (0.41%)    | 4 (1.88%)    |

**Legend:** Cases with missing value were represented with 'Missing' category. CRC: Cruces Hospital; HB: Basurto Hospital; HD: Donosti Hospital; TX: Txagorritxu Hospital. Preterm: 35-37 weeks; early term: 38-39 weeks; full term: 40 weeks; late term, 41-42 weeks. Weight at born normal >3 Kg. Mixed food type: maternal and artificial milk.

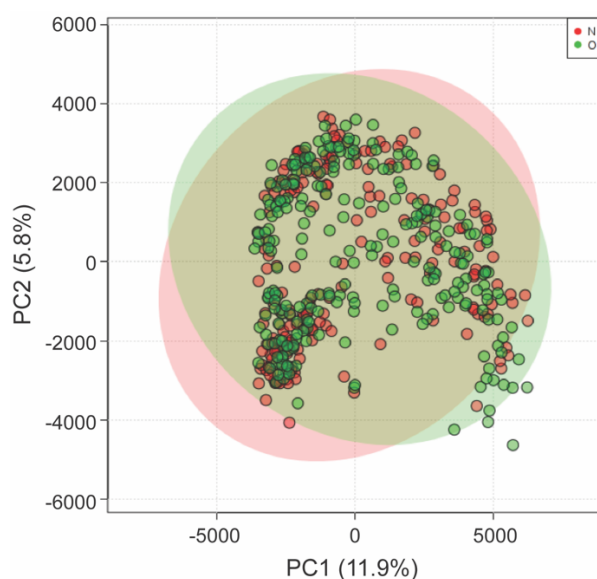

**Figure S1. PCA analysis for AVANCE 600 MHz spectrometer versus IVDr 600 spectrometer in urine samples.** N: Samples measured in the IVDr 600Mz spectrometer, O: Samples measured in the AVANCE 600 MHz spectrometer.

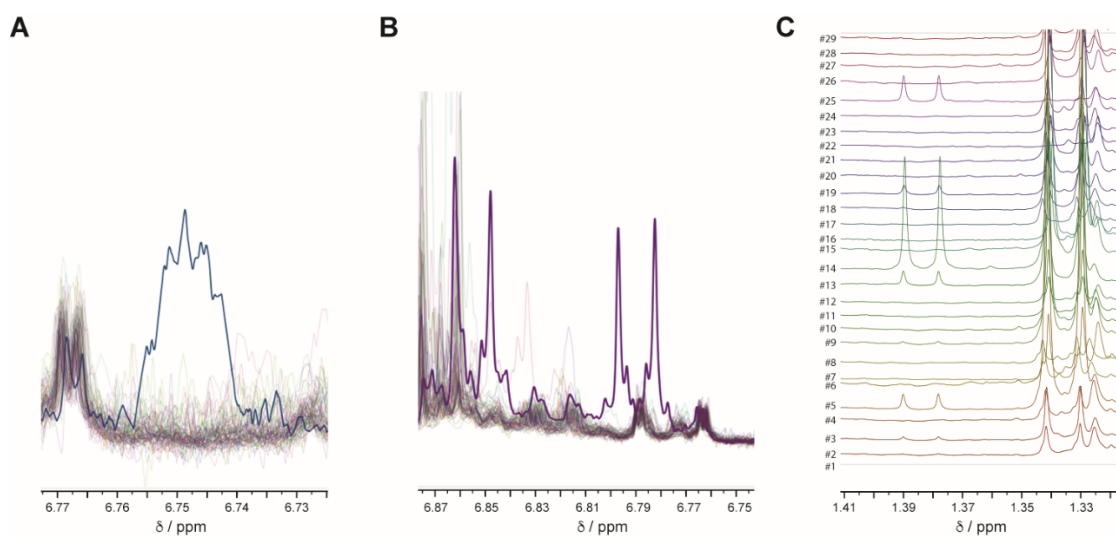

**Figure S2. Different types of metabolites found out in the spectra.** A) Unknown metabolite; B) 4-Phenylacetic acid at abnormal concentration. Phenylketonuria would also require altered levels of 4-hydroxyphenyllactic acid and 4-hydroxyphenylpyruvic acid, but they were found normal. C) Acetoin presence in several urines (#5, #13, #14, #19 and #25) at disparate concentrations is an example of external contamination.

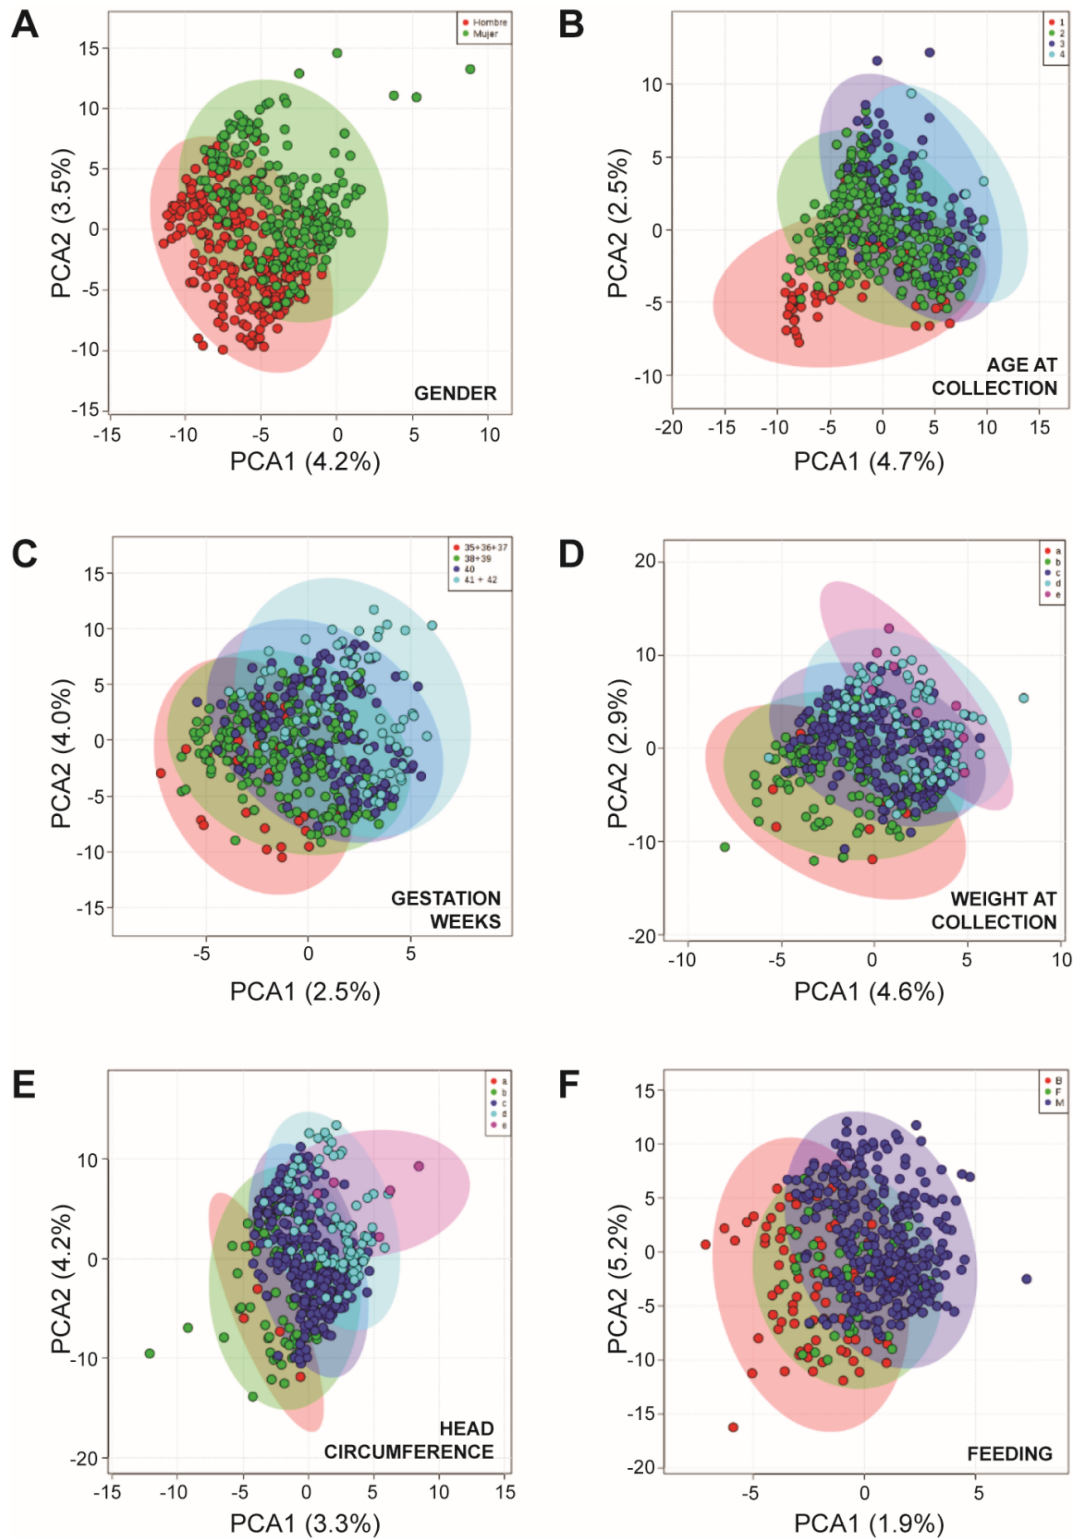

**Figure S3. Two-dimensional PLS-DA score plot urine samples.** A) Gender,  $R^2= 0.405$ ,  $Q^2= -0.211$ . B) Newborn age when the urine sample was taken. 1: 1 day; 2:2 days; 3: 3 days; 4: 4 days.  $R^2= 0.465$ ,  $Q^2= - 0.095$  C) Gestation weeks: a: preterm, 35-37 weeks; b: early term, 38-39 weeks; c: full term, 40 weeks; d: late term, 41-42 weeks.  $R^2= 0.404$ ,  $Q^2= - 0.097$ . D) Weight of the newborn in Kg when the sample was taken. a: 2-2.5, b: 2.5-3, c: 3-3.5, d: 3.5-4, e:>4.  $R^2= 0.474$ ,  $Q^2= - 0.213$ . E) Head circumference in cm, a: 30-32, b: 32-34; c: 34-36; d: 36-38; e: < 38 cm.  $R^2= 0.483$ ,  $Q^2= - 0.235$  F: Feeding type, B: Breastfeeding, F: artificial, M: mixed.  $R^2= 0.433$ ,  $Q^2= - 0.183$ .

**Table S2.** LOD values, GEV distribution values, quartiles, normal and pathogenic values for the 150 metabolites under consideration.

| ReMetabolite |                                | LOD<br>mmol /<br>mol creat | Detection<br>(%) | GEV model parameters |         |         | Quantiles (p') delimiting 95%<br>population |       |           |       | Normal<br>Conc.<br>Mmol /<br>mol creat<br>[39] | Origin / Disease [39]                         | Pathogenic<br>Conc.<br>mmol /<br>mol creat | F <sub>global</sub><br>(from model) |
|--------------|--------------------------------|----------------------------|------------------|----------------------|---------|---------|---------------------------------------------|-------|-----------|-------|------------------------------------------------|-----------------------------------------------|--------------------------------------------|-------------------------------------|
|              |                                |                            |                  |                      |         |         | From model                                  |       | From data |       |                                                |                                               |                                            |                                     |
| #            | Name                           |                            |                  | Location             | Scale   | Shape   | Q2.5                                        | Q97.5 | Q2.5      | Q97.5 |                                                |                                               |                                            |                                     |
| 1            | 1-Methyladenosine              |                            | 0                | -                    | -       | -       | -                                           | -     | -         | -     | 0                                              | Other IEMs                                    | n. a.                                      | -                                   |
| 2            | 1-Methylguanidine              | 98                         | 93.3             | 119.5338             | 15.5537 | -0.1618 | -                                           | 162   | -         | 160   | 0                                              | Bacterial contam. [1]                         | -                                          | -                                   |
| 3            | 1-Methylhistidine              | 380                        | 0                | -                    | -       | -       | -                                           | -     | -         | -     | 0                                              | Propionic acidemia                            | > 40                                       | -                                   |
|              |                                |                            |                  |                      |         |         |                                             |       |           |       |                                                | Maple Sirup Urine disease                     | > 31                                       |                                     |
| 4            | 1-Methylhydantoin              | 49                         | 82.7             | 69.5583              | 17.2163 | 0.0558  | -                                           | 136   | -         | 138   | 0                                              | Bacterial contam. [1]                         | -                                          | -                                   |
| 5            | 1-Methylnicotinamide           | 46                         | 63.9             | 56.5189              | 10.1029 | 0.3155  | -                                           | 113   | -         | 100   | 0.26 - 0.3                                     | Bacterial contam. [1]                         | > 2.3                                      | -                                   |
| 6            | 1,3-Dimethyluric acid          | 13                         | 37               | 16.212               | 3.1027  | 0.275   | -                                           | 28    | -         | 28    | 0                                              | Bacterial contam. [1]                         | -                                          | -                                   |
| 7            | 2-Furoylglycine                | 39                         | 0                | -                    | -       | -       | -                                           | -     | -         | -     | 0                                              | Nutrition mother [2]                          | -                                          | -                                   |
| 8            | 2-Hydroxy-4-methylvaleric acid | 37                         | 0                | -                    | -       | -       | -                                           | -     | -         | -     | 0                                              | Maple Sirup Urine disease                     | > 50                                       | -                                   |
| 9            | 2-Hydroxyisovaleric acid       | 4                          | 2.6              | 3.9923               | 0.1973  | 0.6245  | -                                           | 4     | -         | 2     | 0 - 4                                          | Maple Sirup Urine disease                     | 850 - 3600                                 | 8.46e-08                            |
| 10           | 2-Hydroxyphenylacetic acid     | 10                         | 0                | -                    | -       | -       | -                                           | -     | -         | -     | 0                                              | Phenylketonuria                               | 50 - 2000                                  | -                                   |
| 11           | 2-Ketobutiric acid             | 54                         | 0                | -                    | -       | -       | -                                           | -     | -         | -     | 0                                              | Methionine malabsortion                       | 50 - 200                                   | -                                   |
| 12           | 2-Methylsuccinic acid          | 34                         | 2.0              | -                    | -       | -       | -                                           | -     | -         | -     | 0                                              | Ethylmalonic encephalopathy                   | 100 - 300                                  | -                                   |
|              |                                |                            |                  |                      |         |         |                                             |       |           |       |                                                | Isovaleric acidemia                           | 60 - 600                                   |                                     |
|              |                                |                            |                  |                      |         |         |                                             |       |           |       |                                                | Short Chain Acyl-CoA dehydrogenase deficiency | 20 - 60                                    |                                     |
|              |                                |                            |                  |                      |         |         |                                             |       |           |       |                                                | Glutaric aciduria type II                     | > 60                                       |                                     |
|              |                                |                            |                  |                      |         |         |                                             |       |           |       |                                                | Other IEMs                                    | n. a.                                      |                                     |

|                                 |                                 |          |      |          |         |        |   |     |   |     |           |                                                      |             |           |
|---------------------------------|---------------------------------|----------|------|----------|---------|--------|---|-----|---|-----|-----------|------------------------------------------------------|-------------|-----------|
| 13                              | 2-Oxoglutaric acid              | 160      | 10.9 | 185.1894 | 27.9418 | 0.5398 | - | 232 | - | 240 | 160 - 590 | 3-Methyl-crotonyl-glycinuria                         | 600 - 2000  | 1.61e-03  |
| 14                              | 2-Oxoisocaproic acid            | 5        | 37.2 | 6.7935   | 1.7548  | 0.0052 | - | 11  | - | 12  | 0-2       | Maple Sirup Urine disease                            | 20 - 4400   | 2.29e-04  |
| 15                              | 2-Oxoisovaleric acid            | 4        | 1.5  | -        | -       | -      | - | -   | - | -   | 0         | Maple Sirup Urine disease                            | 300 - 800   | -         |
|                                 |                                 |          |      |          |         |        |   |     |   |     |           | Other IEMs                                           | n. a.       |           |
| 16                              | 3-Aminoisobutyric acid          | 300      | 13.6 | 334.4619 | 36.8205 | 0.4643 | - | 420 | - | 445 | 300 - 390 | Methylmalonic aciduria                               | 400 - 1200  | 3.19e-02  |
| 17                              | 3-Hydroxy-3-methylglutaric acid | 110      | 4.2  | 110.8602 | 2.9915  | 0.5407 | - | 110 | - | 110 | 0 - 110   | 3-Hydroxy-3-Methylglutaryl-CoA-lyase deficiency      | 200 - 11000 | 1.74e-04  |
| 18                              | 3-Hydroxybutyric acid           | 97       | 7.7  | 122.6865 | 24.6908 | 0.1571 | - | 145 | - | 150 | 0.5 - 9.8 | $\beta$ -Ketothiolase deficiency                     | 50 - 200    | >7.14e-02 |
|                                 |                                 |          |      |          |         |        |   |     |   |     |           | Fructose-1,6-biphosphatase deficiency                | 4 - 48      | >7.14e-02 |
|                                 |                                 |          |      |          |         |        |   |     |   |     |           | Glutaric aciduria type I                             | 200 - 800   | 5.38e-03  |
|                                 |                                 |          |      |          |         |        |   |     |   |     |           | Isovaleric acidemia                                  | 200 - 1000  | 5.38e-03  |
|                                 |                                 |          |      |          |         |        |   |     |   |     |           | Ketosis                                              | 100 - 5000  | 6.66e-02  |
|                                 |                                 |          |      |          |         |        |   |     |   |     |           | Propionic acidemia                                   | 100 - 5000  | 6.66e-02  |
|                                 |                                 |          |      |          |         |        |   |     |   |     |           | Long Chain 3-HydroxyacylCoA dehydrogenase deficiency | 100 - 5000  | 6.66e-02  |
|                                 |                                 |          |      |          |         |        |   |     |   |     |           | Maple Sirup Urine disease                            | 200 - 1000  | 5.38e-03  |
| Pyruvate Carboxylase deficiency | 200 - 600                       | 5.38e-03 |      |          |         |        |   |     |   |     |           |                                                      |             |           |
| 19                              | 3-Hydroxyglutaric acid          | 41       | 0.4  | -        | -       | -      | - | -   | - | -   | 0         | Glutaric aciduria type I                             | 60 - 3000   | -         |
|                                 |                                 |          |      |          |         |        |   |     |   |     |           | Glutaric aciduria type I (low excretor)              | 10 - 100    |           |
|                                 |                                 |          |      |          |         |        |   |     |   |     |           | Glutaric aciduria type I (non-excretor)              | 10 - 100    |           |



|    |                            |    |      |        |        |        |   |    |   |    |       |                                                 |            |          |
|----|----------------------------|----|------|--------|--------|--------|---|----|---|----|-------|-------------------------------------------------|------------|----------|
|    |                            |    |      |        |        |        |   |    |   |    |       | Glutaric aciduria type II                       | 0 - 200    |          |
|    |                            |    |      |        |        |        |   |    |   |    |       | Other IEMs                                      | n. a.      |          |
| 20 | 3-Hydroxyisovaleric acid   | 18 | 0.4  | -      | -      | -      | - | -  | - | -  | 0     | $\beta$ -Ketothiolase deficiency                | 100 - 1000 | -        |
|    |                            |    |      |        |        |        |   |    |   |    |       | 3-Methyl-crotonyl-glycinuria                    | 1700-59000 |          |
|    |                            |    |      |        |        |        |   |    |   |    |       | Glutaric aciduria type II late onset            | 100 - 500  |          |
|    |                            |    |      |        |        |        |   |    |   |    |       | Isovaleric acidemia                             | 100 - 2000 |          |
|    |                            |    |      |        |        |        |   |    |   |    |       | 3-Hydroxy-3-Methylglutaryl-CoA-lyase deficiency | 100 - 4000 |          |
|    |                            |    |      |        |        |        |   |    |   |    |       | 3-Methyl-glutaconic aciduria                    | 50-2800    |          |
|    |                            |    |      |        |        |        |   |    |   |    |       | Biotinidase deficiency                          | 50 - 5000  |          |
| 21 | 3-Hydroxypropionic acid    | 93 | 0.4  | -      | -      | -      | - | -  | - | -  | 0     | $\beta$ -Ketothiolase deficiency                | 20 - 2000  | -        |
|    |                            |    |      |        |        |        |   |    |   |    |       | Lactic acidemia                                 | 20 - 1000  |          |
|    |                            |    |      |        |        |        |   |    |   |    |       | Biotinidase deficiency                          | 20 - 500   |          |
|    |                            |    |      |        |        |        |   |    |   |    |       | Propionic acidemia                              | 20 - 2000  |          |
|    |                            |    |      |        |        |        |   |    |   |    |       | Other IEMs                                      | n. a.      |          |
| 22 | 3-Hydroxyvaleric acid      | 6  | 19.7 | 8.9736 | 2.1144 | 0.0509 | - | 14 | - | 14 | 6 - 8 | MMA Cbl A deficiency                            | 2 - 1200   | 2.07e-01 |
|    |                            |    |      |        |        |        |   |    |   |    |       | Propionic acidemia                              | 4 - 1200   | 2.07e-01 |
| 23 | 3-Methyl-2-oxovaleric acid | 19 | 0    | -      | -      | -      | - | -  | - | -  | 0     | Maple Sirup Urine disease                       | 500 - 2500 | -        |
|    |                            |    |      |        |        |        |   |    |   |    |       | Asphyxia                                        | 10 - 50    |          |
| 24 | 3-Methylcrotonglycine      | 60 | 0    | -      | -      | -      | - | -  | - | -  | 0     | $\beta$ -Ketothiolase deficiency                | 11 - 500   | -        |
|    |                            |    |      |        |        |        |   |    |   |    |       | 3-Hydroxy-3-Methylglutaryl-CoA-lyase deficiency | 2 - 450    |          |

|    |                             |      |      |         |         |        |   |    |   |    |         |                                                 |            |           |
|----|-----------------------------|------|------|---------|---------|--------|---|----|---|----|---------|-------------------------------------------------|------------|-----------|
|    |                             |      |      |         |         |        |   |    |   |    |         | 3-Methyl-crotonyl-glycinuria                    | 10 - 1000  |           |
|    |                             |      |      |         |         |        |   |    |   |    |         | Biotinidase deficiency                          | 5 - 50     |           |
|    |                             |      |      |         |         |        |   |    |   |    |         | 3-Hydroxy-3-Methylglutaryl-CoA-lyase deficiency | 60 - 10000 |           |
| 25 | 3-Methylglutaconic acid     | 17   | 0.9  | -       | -       | -      | - | -  | - | -  | 0       | 3-Methyl-glutaconic aciduria                    | 30 - 300   | -         |
|    |                             |      |      |         |         |        |   |    |   |    |         | β-Ketothiolase deficiency                       | 11 - 500   |           |
| 26 | 3-Phenyllactic              | 85   | 0    | -       | -       | -      | - | -  | - | -  | 0       | Phenylketonuria                                 | 200 - 1000 | -         |
| 27 | 4-Aminobutyric acid         | 17   | 13.1 | 19.2461 | 3.0042  | 0.5023 | - | 26 | - | 27 | 17 - 20 | GABA transaminase deficiency                    | 40 - 100   | >1.24e-01 |
| 28 | 4-Aminohippuric acid        | 1700 | 0    | -       | -       | -      | - | -  | - | -  | 0       | Other IEMs                                      | n. a.      | -         |
| 29 | 4-Ethylphenol               | 8    | 0.2  | -       | -       | -      | - | -  | - | -  | 0       | Nutrition mother [1]                            | -          | -         |
| 30 | 4-Hydroxyhippuric acid      | 980  | 0    | -       | -       | -      | - | -  | - | -  | 0       | Chemical contamination (parabens) [1]           | -          | -         |
|    |                             |      |      |         |         |        |   |    |   |    |         | Tyrosinemia type I                              | 140 - 500  | 5.83e-03  |
| 31 | 4-Hydroxyphenylacetic acid  | 36   | 7.9  | 43.8161 | 10.2794 | 0.8775 | - | 58 | - | 64 | 36 - 69 | Tyrosinemia type II                             | 50 - 200   | 3.51e-02  |
|    |                             |      |      |         |         |        |   |    |   |    |         | Tyrosinemia type III                            | 20 - 200   | >7.62e-02 |
|    |                             |      |      |         |         |        |   |    |   |    |         | Transient newborn tyrosinemia                   | 50 - 200   | 3.51e-02  |
|    |                             |      |      |         |         |        |   |    |   |    |         | Phenylketonuria                                 | 50 - 1000  |           |
| 32 | 4-Hydroxyphenyllactic acid  | 470  | 0.2  | -       | -       | -      | - | -  | - | -  | 0       | Tyrosinemia type I                              | 100 - 5000 | -         |
|    |                             |      |      |         |         |        |   |    |   |    |         | Tyrosinemia type III                            | 20 - 2300  |           |
|    |                             |      |      |         |         |        |   |    |   |    |         | Tyrosinemia type I                              | 140 - 2000 |           |
| 33 | 4-Hydroxyphenylpyruvic acid | 45   | 0.2  | -       | -       | -      | - | -  | - | -  | 0       | Tyrosinemia type II                             | 50 - 100   |           |
|    |                             |      |      |         |         |        |   |    |   |    |         | Tyrosinemia type III                            | 20 - 2300  | -         |
|    |                             |      |      |         |         |        |   |    |   |    |         | Transient newborn tyrosinemia                   | 50 - 100   |           |

|    |                       |     |      |         |         |         |    |     |    |     |           |                                                 |            |          |
|----|-----------------------|-----|------|---------|---------|---------|----|-----|----|-----|-----------|-------------------------------------------------|------------|----------|
| 34 | 4-Pyridoxic acid      | 6   | 68.3 | 6.4308  | 0.7417  | 0.6655  | -  | 15  | -  | 11  | 0         | Bacterial contam. [1]                           | -          | -        |
| 35 | 5-Aminolevulinic acid | 3   | 3.8  | 4.1747  | 1.5088  | 0.5449  | -  | 4   | -  | 4   | 0.3       | Tyrosinemia type I                              | 20 - 200   | 1.49e-05 |
| 36 | 5-aminopentanoic acid | 170 | 0    | -       | -       | -       | -  | -   | -  | -   | 0         | Bacterial contami. [1,3]                        | -          | -        |
| 37 | Acetic acid           | 10  | 99.6 | 40.5941 | 28.6368 | 0.4854  | 12 | 332 | 13 | 240 | 2.5 - 106 | Phenylketonuria                                 | > 300      |          |
|    |                       |     |      |         |         |         |    |     |    |     |           | Other IEMs                                      | n. a.      | -        |
| 38 | Acetoacetic acid      | 5   | 99.3 | 11.5112 | 4.5998  | 0.01    | 5  | 29  | 5  | 28  | 5 - 28    | 3-Hydroxy-3-Methylglutaryl-CoA-lyase deficiency | > 28       | -        |
|    |                       |     |      |         |         |         |    |     |    |     |           | $\beta$ -Ketothiolase deficiency                | 50 - 1000  | -        |
|    |                       |     |      |         |         |         |    |     |    |     |           | Fructose-1,6-biphosphatase deficiency           | 100 - 5000 | -        |
|    |                       |     |      |         |         |         |    |     |    |     |           | Ketosis                                         | 50 - 2000  | 0        |
|    |                       |     |      |         |         |         |    |     |    |     |           | Propionic acidemia                              | 50 - 5000  | 0        |
| 39 | Acetoine              | 9   | 0    | -       | -       | -       | -  | -   | -  | -   | 0         | Chemical & bacterial contaminant [4]            | -          | -        |
| 40 | Acetone               | 14  | 52.1 | 18.1403 | 4.6949  | 0.5187  | -  | 51  | -  | 41  | 14 - 110  | Pyruvate carboxylase deficiency                 | 30 - 100   | 5.65e-03 |
|    |                       |     |      |         |         |         |    |     |    |     |           | Propionic acidemia                              | 30 - 100   | 5.65e-03 |
|    |                       |     |      |         |         |         |    |     |    |     |           | Fructose-1,6-biphosphatase deficiency           | 30 - 100   | 5.65e-03 |
| 41 | Adenine               | 13  | 17.7 | 13.8101 | 1.0446  | 0.259   | -  | 16  | -  | 16  | 13 - 20   | Adenine phosphoribosyltransferase deficiency    | 10 - 100   | 9.44e-07 |
| 42 | Adenosine             | 950 |      | -       | -       | -       | -  | -   | -  | -   | 0         | Other IEMs                                      | n. a.      | -        |
| 43 | Alanine               | 14  | 98.0 | 48.5749 | 15.4701 | -0.0845 | 21 | 97  | 23 | 98  | 27 - 350  | Hartnup disease                                 | 400 - 1400 | 0        |
|    |                       |     |      |         |         |         |    |     |    |     |           | Pyruvate carboxylase deficiency                 | 700 - 1400 | 0        |
|    |                       |     |      |         |         |         |    |     |    |     |           | Ethylmalonic encephalopathy                     | 70 - 1400  | 0        |

|    |                       |        |      |          |          |        |   |     |   |     |           |                                          |             |           |
|----|-----------------------|--------|------|----------|----------|--------|---|-----|---|-----|-----------|------------------------------------------|-------------|-----------|
|    |                       |        |      |          |          |        |   |     |   |     |           | Lactic acidemia                          | -           | -         |
| 44 | Allantoin             | 19     | 56.2 | 22.416   | 4.0689   | 0.6276 | - | 60  | - | 51  | 0         | Bacterial contam. [5,6]                  | n. a.       | n. a.     |
| 45 | Allopurinol           | 18     | 30.2 | 18.7797  | 1.1549   | 0.5858 | - | 25  | - | 24  | 18 - 23   | Cosmetic and probiotic contamination [7] | 30 - 100    | >3.02e-01 |
|    |                       |        |      |          |          |        |   |     |   |     |           | Drug (active principle)                  | 30 - 300    | >3.02e-01 |
| 46 | Arginine              | 0-4800 | 0    | -        | -        | -      | - | -   | - | -   | 0         | Cystinuria                               | > 1000      | -         |
| 47 | Argininosuccinic acid | 99     | 0    | -        | -        | -      | - | -   | - | -   | 0         | Argininosuccinic aciduria                | 1 - 4000    | -         |
|    |                       |        |      |          |          |        |   |     |   |     |           | Citrullinemia                            | 0.1 - 200   | -         |
| 48 | Benzoic acid          | 12     | 3.2  | -        | -        | -      | - | -   | - | -   | 0         | Chemical & Bacterial contam. [8]         | -           | -         |
| 49 | Betaine               | 44     | 77   | 255.2187 | 102.61   | -0.134 | - | 536 | - | 556 | 44 - 1200 | Homocistinuria                           | 1200 - 5000 |           |
|    |                       |        |      |          |          |        |   |     |   |     |           | Dimethylglycine dehydrogenase deficiency | 1200 - 5000 |           |
|    |                       |        |      |          |          |        |   |     |   |     |           | Drug (active principle)                  | 1200 - 5000 | -         |
| 50 | Butyric acid          | 36     | 25.6 | 29.5057  | 3.1989   | 0.0697 | - | 37  | - | 37  | 0         | Bacterial contam. [9,10]                 | -           | -         |
| 51 | Caffeine              | 8      | 8.3  | 8.8787   | 1.1222   | 0.3899 | - | 10  | - | 10  | 0         | Nutrition mother [11]                    | -           | -         |
| 52 | Choline               | 94     | 0    | -        | -        | -      | - | -   | - | -   | 0         | Nutrition mother [1]                     | -           | -         |
| 53 | Citraconic acid       | 86     | 0    | -        | -        | -      | - | -   | - | -   | 0         | Nutrition mother [1,12]                  | -           | -         |
| 54 | Citric acid           | 46     | 60.8 | 85.1302  | 42.3419  | 0.4832 | - | 398 | - | 300 | 46 - 1400 | 3-Methylg-lutaconic aciduria             | 500 - 25000 | 1.58e-02  |
| 55 | Citrulline            | 780    | 0    | -        | -        | -      | - | -   | - | -   | 0         | Citrullinemia                            | 781 - 5000  |           |
|    |                       |        |      |          |          |        |   |     |   |     |           | GABA transaminase deficiency             | 781 - 2000  | -         |
|    |                       |        |      |          |          |        |   |     |   |     |           | Other IEMs                               | n. a.       |           |
| 56 | Creatine (CRE)        | 50     | 73.7 | 270.1886 | 191.6025 | 0.0375 | - | 962 | - | 901 | 1 - 1.8   | Creatine transport deficiency            | CRE/CRN > 2 | -         |
| 57 | Creatinine (CRN)      | -      | 100  | 6.2413   | 3.9766   | -0.136 | 1 | 18  | 2 | 17  | 1         | Creatine transport deficiency            | CRE/CRN > 2 | -         |
| 58 | Cystine               | 75     | 6.6  | 86.5746  | 9.7811   | 0.4668 | - | 94  | - | 95  | 0 - 75    | Cystinuria                               | 700 - 10000 | 4.01e-05  |

|    |                   |     |      |          |         |         |    |     |    |     |            |                                             |             |           |
|----|-------------------|-----|------|----------|---------|---------|----|-----|----|-----|------------|---------------------------------------------|-------------|-----------|
| 59 | Cytosine          | 9   | 0    | -        | -       | -       | -  | -   | -  | -   | 1.1 - 10.7 | Other IEMs                                  | n. a.       | -         |
| 60 | D-Galactonic acid | 130 | 0.2  | -        | -       | -       | -  | -   | -  | -   | 0          | Galactosemia                                | > 5         | -         |
|    |                   |     |      |          |         |         |    |     |    |     |            | Other IEMs                                  | n. a.       | -         |
| 61 | D-Galactose       | 85  | 34.7 | 154.2749 | 67.3716 | 0.3394  | -  | 434 | -  | 420 | 85 - 140   | Citrullinemia                               | 600 - 12000 | 3.47e-01  |
|    |                   |     |      |          |         |         |    |     |    |     |            | Galactosemia type III                       | 150 - 800   | >3.47e-01 |
|    |                   |     |      |          |         |         |    |     |    |     |            | Galactosemia type II                        | 400 - 1200  | 3.09e-02  |
|    |                   |     |      |          |         |         |    |     |    |     |            | Galactosemia type I                         | 600 - 12000 | 1.06e-02  |
|    |                   |     |      |          |         |         |    |     |    |     |            | Fanconi-Bickel syndrome                     | > 85        | -         |
| 62 | D-Gluconic acid   | 190 | 0    | -        | -       | -       | -  | -   | -  | -   | 0          | Bacterial contam. [13,14]                   | -           | -         |
| 63 | D-Glucose         | 76  | 92.6 | 164.8134 | 56.4634 | 0.1581  | -  | 439 | -  | 412 | 76 - 800   | Glucose-galactose malabsorption             | 800 - 16000 | 3.47e-01  |
|    |                   |     |      |          |         |         |    |     |    |     |            | Fanconi-Bickel syndrome                     | 800 - 16000 | >3.47e-01 |
| 64 | D-Lactose         | 96  | 68.3 | 199.3838 | 92.6355 | 0.1854  | -  | 619 | -  | 591 | 96 - 850   | Lactose intolerance                         | 100 - 2000  | 3.09e-02  |
| 65 | D-Mandelic acid   | 4   | 0.4  | -        | -       | -       | -  | -   | -  | -   | 0 - 4      | Phenylketonuria                             | 8 - 135     | -         |
| 66 | D-Mannitol        | 430 | 1.5  | -        | -       | -       | -  | -   | -  | -   | 0          | Drug (excipient) [15]                       | 10 - 100    | -         |
| 67 | D-Mannose         | 20  | 45.7 | 28.6174  | 9.0794  | 0.3718  | -  | 73  | -  | 66  | 0          | Bacterial contam. [1]                       | -           | -         |
| 68 | D-Panthenol       | 19  | 0.9  | -        | -       | -       | -  | -   | -  | -   | 0          | Drug (excipient) [16]                       | 10 - 100    | -         |
| 69 | D-Xylose          | 840 | 0    | -        | -       | -       | -  | -   | -  | -   | 0          | Other IEMs                                  | n. a.       | -         |
| 70 | Dihydrothymine    | 430 | 2.4  | -        | -       | -       | -  | -   | -  | -   | 0          | Dihydropyriminidase deficiency              | 800 - 4000  | -         |
|    |                   |     |      |          |         |         |    |     |    |     |            | Other IEMs                                  | n. a.       | -         |
| 71 | Dihydrouracil     | 130 | 0    | -        | -       | -       | -  | -   | -  | -   | 0          | Dihydropyriminidase deficiency              | > 0         | -         |
| 72 | Dimethylamine     | 8   | 100  | 91.8363  | 22.2719 | -0.2457 | 58 | 146 | 59 | 140 | 20 - 60    | Chemical contam. & Nutrition mother [17,18] | -           | -         |
| 73 | DL-Alloisoleucine | 47  | 0    | -        | -       | -       | -  | -   | -  | -   | 0          | Bacterial contam. [1]                       | -           | -         |
| 74 | DL-Kyneurin       | 790 | 0    | -        | -       | -       | -  | -   | -  | -   | 0          | Kynureninase deficiency                     | 10- 100     | -         |
| 75 | DL-Tyrosine       | 43  | 0    | -        | -       | -       | -  | -   | -  | -   | 0          | Methylmalonic aciduria                      | 150 - 15500 | -         |

|    |                   |     |      |          |         |        |   |     |   |     |          |                                               |             |          |
|----|-------------------|-----|------|----------|---------|--------|---|-----|---|-----|----------|-----------------------------------------------|-------------|----------|
|    |                   |     |      |          |         |        |   |     |   |     |          | Tyrosinemia type I                            | > 150       |          |
|    |                   |     |      |          |         |        |   |     |   |     |          | Hartnup disease                               | 50 - 500    |          |
| 76 | E-Glutaconic acid | 130 | 0    | -        | -       | -      | - | -   | - | -   | 0        | Glutaric aciduria type I                      | 2 - 360     | -        |
|    |                   |     |      |          |         |        |   |     |   |     |          | Glutaric aciduria type I (low excretor)       | 2 - 360     |          |
|    |                   |     |      |          |         |        |   |     |   |     |          | Glutaric aciduria type I (non-excretor)       | 2 - 360     |          |
|    |                   |     |      |          |         |        |   |     |   |     |          | Glutaric aciduria type II                     | 2 - 360     |          |
| 77 | Ethanol           | 840 | 0    | -        | -       | -      | - | -   | - | -   | 0        | Nutrition mother [19]                         | -           | -        |
| 78 | Ethylmalonic acid | 20  | 27.3 | 21.5563  | 1.984   | 0.4114 | - | 29  | - | 29  | 20 - 40  | Ethylmalonic encephalopathy                   | 50 - 500    | 2.34e-03 |
|    |                   |     |      |          |         |        |   |     |   |     |          | Short Chain Acyl-CoA dehydrogenase deficiency | 180 - 1150  | 4.92e-05 |
|    |                   |     |      |          |         |        |   |     |   |     |          | Glutaric aciduria type II                     | 50 - 1200   | 2.34e-03 |
|    |                   |     |      |          |         |        |   |     |   |     |          | Glutaric aciduria type II (late onset)        | 50 - 1200   | 2.34e-03 |
| 79 | Formic acid       | 92  | 32.8 | 121.4924 | 31.9467 | 0.6439 | - | 313 | - | 290 | 20 - 200 | Chemical contam. [20,21]                      | -           | -        |
| 80 | Fumaric acid      | 2   | 92.8 | 5.845    | 2.9225  | 0.1208 | - | 19  | - | 18  | 2 - 40   | 2-Ketoadipic acidemia                         | 100 - 1000  | 1.82e-06 |
|    |                   |     |      |          |         |        |   |     |   |     |          | Fumaric aciduria                              | 3000 - 4000 | 0        |
|    |                   |     |      |          |         |        |   |     |   |     |          | Ethylmalonic encephalopathy                   | > 100       |          |
| 81 | Galactitol        | 300 | 0    | -        | -       | -      | - | -   | - | -   | 0        | Galactosemia                                  | 30 - 90000  | -        |
|    |                   |     |      |          |         |        |   |     |   |     |          | Fanconi-Bickel syndrome                       | 5 - 500     |          |
| 82 | Glutamic acid     | 330 | 0.4  | -        | -       | -      | - | -   | - | -   | 0        | Dicarboxylic aminoaciduria                    | 50 - 1400   | -        |
|    |                   |     |      |          |         |        |   |     |   |     |          | Other IEMs                                    | n. a.       |          |
| 83 | Glutamine         | 830 | 0    | -        | -       | -      | - | -   | - | -   | 0        | Hartnup disease                               | 300 - 3000  | -        |
|    |                   |     |      |          |         |        |   |     |   |     |          | Other IEMs                                    | n. a.       |          |

|    |                      |     |      |          |          |         |    |     |    |     |           |                                                 |              |           |
|----|----------------------|-----|------|----------|----------|---------|----|-----|----|-----|-----------|-------------------------------------------------|--------------|-----------|
| 84 | Glutaric acid        | 67  | 0    | -        | -        | -       | -  | -   | -  | -   | 0         | 3-Hydroxy-3-Methylglutaryl-CoA-lyase deficiency | 2 - 100      | -         |
|    |                      |     |      |          |          |         |    |     |    |     |           | Glutaric acidemia type I                        | 500 - 12000  |           |
|    |                      |     |      |          |          |         |    |     |    |     |           | Glutaric acidemia type I (low excretor)         | 1-200        |           |
|    |                      |     |      |          |          |         |    |     |    |     |           | Glutaric acidemia type II                       | 500 - 12000  |           |
|    |                      |     |      |          |          |         |    |     |    |     |           | Glutaric acidemia type II (late onset)          | 500 - 12000  |           |
|    |                      |     |      |          |          |         |    |     |    |     |           | Glutaric acidemia type III                      | 100 - 500    |           |
| 85 | Glycerol             | 790 | 0    | -        | -        | -       | -  | -   | -  | -   | 0         | Fructose intolerance                            | 220 - 2000   | -         |
| 86 | Glycine              | 30  | 98.7 | 262.4517 | 130.1257 | -0.0027 | 70 | 737 | 78 | 749 | 87 - 1900 | Drug (active principle & excipient)             | 1000 - 3000  | 5.21e-01  |
|    |                      |     |      |          |          |         |    |     |    |     |           | Isovaleric acidemia                             | 500 - 5000   | 3.26e-03  |
|    |                      |     |      |          |          |         |    |     |    |     |           | Propionic acidemia                              | 2000 - 2500  | 3.26e-03  |
|    |                      |     |      |          |          |         |    |     |    |     |           | Transient immaturity of transporters            | 2000 - 6000  | 3.26e-06  |
|    |                      |     |      |          |          |         |    |     |    |     |           | Ornithine transcarbamylase deficiency           | 2000 - 5000  | 7.91e-01  |
|    |                      |     |      |          |          |         |    |     |    |     |           | Arginosuccinic aciduria                         | 2000 - 5000  | 1.23e-03  |
|    |                      |     |      |          |          |         |    |     |    |     |           | MMA Cbl A deficiency                            | 2000 - 5000  | 3.26e-03  |
| 87 | Glycolic acid        | 190 | 30.9 | 220.487  | 30.864   | 0.2947  | -  | 333 | -  | 329 | 190 - 480 | Hyperoxaluria type II                           | > 500        | >3.09e-01 |
| 88 | Guanidinoacetic acid | 93  | 27.7 | 106.2827 | 12.6332  | 0.1353  | -  | 141 | -  | 140 | 93 - 190  | Argininemia                                     | > 200        | -         |
|    |                      |     |      |          |          |         |    |     |    |     |           | Guanidinoacetate Methyltransferase deficiency   | > 200        | -         |
| 89 | Hippuric acid        | 49  | 5.3  | 53.1678  | 3.3695   | 0.2838  | -  | 55  | -  | 54  | 49 - 150  | Argininemia                                     | 200 - 5000   | -         |
|    |                      |     |      |          |          |         |    |     |    |     |           | Argininosuccinic aciduria                       | 1000 - 15000 | 1.01e-08  |
|    |                      |     |      |          |          |         |    |     |    |     |           | Citrullinemia                                   | 200 - 50000  | 5.01e-02  |
|    |                      |     |      |          |          |         |    |     |    |     |           | Transient infantile liver failure               | 1000 - 15000 | 1.01e-08  |

|     |                     |     |      |          |         |         |   |     |   |     |         |                                             |              |           |
|-----|---------------------|-----|------|----------|---------|---------|---|-----|---|-----|---------|---------------------------------------------|--------------|-----------|
|     |                     |     |      |          |         |         |   |     |   |     |         | MMA Cbl A deficiency                        | 1000 - 15000 | 1.01e-08  |
|     |                     |     |      |          |         |         |   |     |   |     |         | Ornithine transcarbamylase deficiency       | 300 - 10000  | >5.28e-02 |
|     |                     |     |      |          |         |         |   |     |   |     |         | Propionic acidemia                          | 1000 - 15000 | 1.01e-08  |
|     |                     |     |      |          |         |         |   |     |   |     |         | Drug (excipient) [22]                       | 500 - 50000  | 1.35e-07  |
| 90  | Imidazole           | 38  | 0    | -        | -       | -       | - | -   | - | -   | 9       | Chemical & bacterial contam. [1]            | -            | -         |
| 91  | Inosine             | 17  | 0.4  | -        | -       | -       | - | -   | - | -   | 0       | Methylmalonic aciduria                      | 150 - 15500  | -         |
|     |                     |     |      |          |         |         |   |     |   |     |         | Other IEMs                                  | n. a.        |           |
| 92  | Isobutyrylglycine   | 29  | 0    | -        | -       | -       | - | -   | - | -   | 0       | Glutaric aciduria type II                   | 5 - 200      | -         |
|     |                     |     |      |          |         |         |   |     |   |     |         | Other IEMs                                  | n. a.        |           |
| 93  | Isopropanol         | 9   | 4.5  | 13.5872  | 4.7241  | 0.6861  | - | 15  | - | 15  | 0 - 9   | Chemical contam. [23]                       | -            | >4.53e-02 |
| 94  | L-Ascorbic acid     | 270 | 0    | -        | -       | -       | - | -   | - | 0   | 0       | Drug (active principle & excipient) [24]    | -            | -         |
| 95  | L-Citramalic acid   | 560 | 0    | -        | -       | -       | - | -   | - | 0   | 0 - 100 | n. d.                                       | -            | -         |
| 96  | L-Fucose            | 300 | 20.5 | 366.7539 | 74.63   | 0.3979  | - | 601 | - | 605 | 0       | Bacterial contam. [1]                       | -            | -         |
| 97  | L-Homocystine       | 170 | 0    | -        | -       | -       | - | -   | - | 0   | 0 - 1   | Homocystinuria                              | 12 - 250     | -         |
| 98  | L-Isoleucine        | 47  | 0    | -        | -       | -       | - | -   | - | -   | 0       | Hartnup disease                             | 50 - 500     | -         |
|     |                     |     |      |          |         |         |   |     |   |     |         | Maple Sirup Urine disease                   | 50 - 500     |           |
| 99  | L-Pyroglutamic acid | 5   | 23.2 | 40.3368  | 13.3198 | -0.1977 | - | 64  | - | 64  | 5 - 44  | Drug (active principle & excipient) [25,26] | 50 - >500    | 2.03e-01  |
|     |                     |     |      |          |         |         |   |     |   |     |         | MMA Cbl A deficiency                        | 100 - 1000   | 4.03e-06  |
|     |                     |     |      |          |         |         |   |     |   |     |         | Ornithine transcarbamylase deficiency       | 50 - 1000    | 8.54e-02  |
|     |                     |     |      |          |         |         |   |     |   |     |         | Propionic acidemia                          | 50 - 100     | 2.03e-01  |
|     |                     |     |      |          |         |         |   |     |   |     |         | Transient immaturity of transporters        | 50 - 500     | 8.54e-02  |
| 100 | L-Threonic acid     | 180 | 0.4  | -        | -       | -       | - | -   | - | -   | 0 - 100 | Bacterial contam. [1,27]                    | 100 - 500    | -         |



|                        |                       |          |      |          |         |         |   |     |   |     |          |                                      |             |          |
|------------------------|-----------------------|----------|------|----------|---------|---------|---|-----|---|-----|----------|--------------------------------------|-------------|----------|
| 101                    | L-Tryptophan          | 49       | 0    | -        | -       | -       | - | -   | - | -   | 0        | Hartnup disease                      | 80 - 240    | -        |
|                        |                       |          |      |          |         |         |   |     |   |     |          | Other IEMs                           | n. a.       |          |
| 102                    | Lactic acid           | 45       | 90   | 81.522   | 32.3222 | 0.3617  | - | 317 | - | 250 | 45 - 410 | 3-Methyl-glutaconic aciduria type IV | 500 - 1000  | 2.90e-02 |
|                        |                       |          |      |          |         |         |   |     |   |     |          | Biotinidase deficiency               | 500 - 75000 | 2.90e-02 |
|                        |                       |          |      |          |         |         |   |     |   |     |          | Pyruvate decarboxylase deficiency    | 500 - 3000  | 2.90e-02 |
|                        |                       |          |      |          |         |         |   |     |   |     |          | Lactic acidemia                      | 500 - 3000  | 2.90e-02 |
|                        |                       |          |      |          |         |         |   |     |   |     |          | Ethylmalonic encephalopathy          | 400 - 3000  |          |
|                        |                       |          |      |          |         |         |   |     |   |     |          | Asphyxia                             | 400 - 1000  | 4.03e-02 |
| Bacterial contam. [28] | 100 - 7500            | 4.03e-01 |      |          |         |         |   |     |   |     |          |                                      |             |          |
| 103                    | Leucine               | 13       | 64.7 | 16.3284  | 2.6238  | -0.0847 | - | 24  | - | 23  | 13 - 40  | Maple Sirup Urine disease            | 80 - 240    | 0        |
|                        |                       |          |      |          |         |         |   |     |   |     |          | Hartnup disease                      | 50 - 200    | 0        |
| 104                    | Maleic acid           | 7        | 22.3 | 8.7323   | 2.2071  | 0.5818  | - | 17  | - | 18  | 2 - 40   | Bacterial contam. [1]                | -           | -        |
| 105                    | Malic acid            | 81       | 4.2  | 167.1373 | 40.5147 | -0.1954 | - | 164 | - | 160 | 81 - 250 | 2-Ketoadipic acidemia                | 500 - 1500  | -        |
| 106                    | Methanol              | 91       | 11.6 | 108.0949 | 15.5829 | 0.3429  | - | 131 | - | 130 |          | Bacterial contam. [29]               | -           | -        |
| 107                    | Methionine            | 13       | 0.2  | -        | -       | -       | - | -   | - | -   | 0        | Homocystinuria                       | 25 - 200    | -        |
|                        |                       |          |      |          |         |         |   |     |   |     |          | Other IEMs                           | n. a.       |          |
| 108                    | Methylmalonic acid    | 10       | 12.7 | 11.6077  | 1.9505  | 0.3023  | - | 15  | - | 15  | 10 - 20  | Isovaleric aciduria                  | 50 - 500    | 2.00e-04 |
|                        |                       |          |      |          |         |         |   |     |   |     |          | MMA Cbl A deficiency                 | 150 - 15500 | 4.13e-06 |
| 109                    | Myo-Inositol          | 2500     | 0.7  | -        | -       | -       | - | -   | - | -   |          | Transketolase deficiency             | -           | -        |
| 110                    | N-Acetylaspartic acid | 48       | 1.8  | -        | -       | -       | - | -   | - | -   | 0        | Canavan disease                      | 100 - 10000 | -        |
| 111                    | N-Acetylglutamate     | 42       | 0    | -        | -       | -       | - | -   | - | -   | 0        | Aminoacylase I deficiency            | 50 - 100    | -        |
| 112                    | N-Acetylphenylalanine | 87       | 0    | -        | -       | -       | - | -   | - | -   | 0        | Phenylketonuria                      | 100 - 500   | -        |
| 113                    | N-Acetyltyrosine      | 1100     | 0    | -        | -       | -       | - | -   | - | -   | 0        | Tyrosinemia type I                   | > 200       | -        |
|                        |                       |          |      |          |         |         |   |     |   |     |          | Tyrosinemia type II                  | > 200       |          |

|     |                         |      |      |         |         |         |   |     |    |     |          |                                          |             |           |
|-----|-------------------------|------|------|---------|---------|---------|---|-----|----|-----|----------|------------------------------------------|-------------|-----------|
| 114 | N-Isovaleroylglycine    | 2    | 43.1 | 2.8116  | 0.8636  | -0.1523 | - | 5   | -  | 5   | 2 - 5    | Ethylmalonic encephalopathy              | 5 - 150     | 1.61e-02  |
|     |                         |      |      |         |         |         |   |     |    |     |          | Glutaric aciduria type II                | 5 - 1000    | 1.61e-02  |
|     |                         |      |      |         |         |         |   |     |    |     |          | Isovaleric aciduria                      | 10 - 9000   | 0         |
| 115 | N,N-Dimethylglycine     | 15   | 97.5 | 40.3539 | 15.4228 | -0.0359 | - | 93  | 15 | 94  | 15 - 220 | Dimethylglycine dehydrogenase deficiency | 300 - 600   | 5.91e-12  |
| 116 | Neopterin               | 17   | 0    | -       | -       | -       | - | -   | -  | -   | 0 - 2    | Other IEMs                               | > 20        | -         |
| 117 | Orotic acid             | 5    | 0.4  | -       | -       | -       | - | -   | -  | -   | 0        | Argininemia                              | 10 - 1000   | -         |
|     |                         |      |      |         |         |         |   |     |    |     |          | Argininosuccinic aciduria                | 2 - 500     |           |
|     |                         |      |      |         |         |         |   |     |    |     |          | Citrullinemia                            | 5 - 600     |           |
|     |                         |      |      |         |         |         |   |     |    |     |          | Ornithine transcarbamylase deficiency    | 10 - 1300   |           |
|     |                         |      |      |         |         |         |   |     |    |     |          | Orotic aciduria                          | 1400 - 5600 |           |
|     |                         |      |      |         |         |         |   |     |    |     |          | Other IEMs                               | n. a.       |           |
| 118 | Oxaloacetic acid        | 44   | 53.6 | 69.8169 | 23.9507 | 0.3212  | - | 190 | -  | 180 | 0 - 5    | Other IEMs                               | n. a.       | -         |
| 119 | Oxypurinol              | 19   | 40.2 | 20.8088 | 1.9907  | 0.3055  | - | 29  | -  | 29  | 19 - 37  | Drug (excipient) [31]                    | 10 - 300    | >4.02e-01 |
| 120 | Pantothenic acid        | 20   | 71.3 | 21.9973 | 2.1004  | 0.2011  | - | 32  | -  | 30  | 20 - 50  | Drug (excipient) [1]                     | 50 - 1000   | >6.89e-01 |
| 121 | Paracetamol             | 50   | 0    | -       | -       | -       | - | -   | -  | -   | 0        | Drug (active princ.) [32]                | -           | -         |
| 122 | Paracetamol-glucuronide | 1500 | 0    | -       | -       | -       | - | -   | -  | -   | 0        | Drug (active princ.) [33]                | -           | -         |
| 123 | Phenylacetic acid       | 470  | 0    | -       | -       | -       | - | -   | -  | -   | 0        | Phenylketonuria                          | 500 - 5000  | -         |
| 124 | Phenylalanine           | 120  | 0    | -       | -       | -       | - | -   | -  | -   | 0        | Phenylketonuria                          | 50 - 1000   | -         |
|     |                         |      |      |         |         |         |   |     |    |     |          | Other IEMs                               | n. a.       |           |
| 125 | Phenylpyruvic acid      | 85   | 0    | -       | -       | -       | - | -   | -  | -   | 0        | Phenylketonuria                          | 300 - 1000  | -         |
| 126 | Pimelic acid            | 74   | 0    | -       | -       | -       | - | -   | -  | -   | 0        | Other IEMs                               | n. a.       | -         |
| 127 | Proline betaine         | 24   | 47.3 | 34.9607 | 9.5305  | 0.0797  | - | 66  | -  | 64  | 0        | Nutrition mother [34]                    | -           | -         |
| 128 | Propionic acid          | 76   | 7.9  | 85.687  | 12.5668 | 0.8354  | - | 97  | -  | 96  | 0 - 76   | Propionic acidemia                       | n. a.       | n.a.      |
| 129 | Propionylglycine        | 2    | 0.2  | -       | -       | -       | - | -   | -  | -   | 0        | Medium Chain Acyl CoA deficiency         | 1 - 90      | -         |

|     |                  |     |      |          |         |        |   |     |   |     |           |                                             |            |          |
|-----|------------------|-----|------|----------|---------|--------|---|-----|---|-----|-----------|---------------------------------------------|------------|----------|
|     |                  |     |      |          |         |        |   |     |   |     |           | Propionic acidemia                          | 4 - 450    |          |
|     |                  |     |      |          |         |        |   |     |   |     |           | Methylmalonic aciduria                      | 5 - 450    |          |
| 130 | Propylene glycol | 45  | 51.0 | 77.7727  | 32.4224 | 0.3924 | - | 256 | - | 219 | 45 - 1200 | Chemical contam. [1]                        | -          | -        |
| 131 | Pyrocatechol     | 170 | 0    | -        | -       | -      | - | -   | - | -   | 0 - 15    | Other IEMs                                  | -          | -        |
| 132 | Pyruvic acid     | 13  | 77.1 | 16.5817  | 3.3106  | 0.145  | - | 31  | - | 30  | 13 - 41   | 3-Methyl-glutaconic aciduria                | 50 - 200   | 1.54e-03 |
| 133 | Quinolinic acid  | 38  | 0    | -        | -       | -      | - | -   | - | -   | 0         | Bacterial contam. [35]                      | -          | -        |
| 134 | Sarcosine        | 5   | 58.0 | 5.2745   | 0.5865  | 0.8539 | - | 14  | - | 9   | 5 - 25    | Glutaric aciduria type II                   | 25 - 100   | 1.54e-03 |
|     |                  |     |      |          |         |        |   |     |   |     |           | Sarcosinemia                                | 100 - 5000 | 4.56e-01 |
|     |                  |     |      |          |         |        |   |     |   |     |           | Nutrition of the mother                     | 30 - 300   | 4.56e-01 |
| 135 | Succinic acid    | 8   | 88.4 | 17.8749  | 8.5641  | 0.4197 | - | 87  | - | 67  | 9 - 360   | 2-Ketoadipic acidemia                       | 400 - 1200 | 7.14e-04 |
|     |                  |     |      |          |         |        |   |     |   |     |           | 3-Methyl-glutaconic aciduria type II        | 400 - 1200 | 7.14e-04 |
|     |                  |     |      |          |         |        |   |     |   |     |           | Ethylmalonic encephalopathy                 | 400 - 1200 | 7.14e-04 |
|     |                  |     |      |          |         |        |   |     |   |     |           | Canavan disease                             | n. a.      | n. a.    |
|     |                  |     |      |          |         |        |   |     |   |     |           | Pyruvate carboxylase deficiency             | 400 - 1200 | 7.14e-04 |
|     |                  |     |      |          |         |        |   |     |   |     |           | Fumaric aciduria                            | 400 - 1200 | 7.14e-04 |
| 136 | Succinylacetone  | 410 | 0    | -        | -       | -      | - | -   | - | -   | 0 - 10    | Tyrosinemia type I                          | > 10       | -        |
| 137 | Syringic acid    | 10  | 10.5 | 10.9365  | 1.2741  | 0.4834 | - | 13  | - | 13  |           | Bacterial contam & Nutrition mother [36,37] | -          | -        |
| 138 | Tartaric acid    | 45  | 2.2  | -        | -       | -      | - | -   | - | -   | 0 - 60    | Other IEMs                                  | -          | -        |
| 139 | Taurine          | 250 | 29.3 | 313.7225 | 72.0296 | 0.609  | - | 689 | - | 679 | 250 - 910 | Other IEMs                                  | 900 - 2000 | 1.42e-02 |
| 140 | Theobromine      | 81  | 1.1  | -        | -       | -      | - | -   | - | -   |           | Nutrition mother [38]                       | -          | -        |
| 141 | Thymine          | 4   | 1.5  | -        | -       | -      | - | -   | - | -   | 0         | Dihydropyrimidinase deficiency              | 2 - 40     | -        |
|     |                  |     |      |          |         |        |   |     |   |     |           | Dihydropyrimidine Dehydrogenase deficiency  | 20 - 80    |          |

|     |                  |     |      |         |        |        |   |    |   |    |         |                                            |           |          |
|-----|------------------|-----|------|---------|--------|--------|---|----|---|----|---------|--------------------------------------------|-----------|----------|
| 142 | Thymol           | 170 | 0    | -       | -      | -      | - | -  | - | -  | 0       | Chemical contamination & drug (excipient)  | -         | -        |
| 143 | Tiglylglycine    | 74  | 0    | -       | -      | -      | - | -  | - | -  | 0       | β-Ketothiolase deficiency                  | 20 - 1500 | -        |
|     |                  |     |      |         |        |        |   |    |   |    |         | Propionic acidemia                         | 20 - 200  |          |
|     |                  |     |      |         |        |        |   |    |   |    |         | Other IEMs                                 | n. a.     |          |
| 144 | Trigonelline     | 33  | 0    | -       | -      | -      | - | -  | - | -  | 0       | Nutrition mother [1]                       | -         | -        |
| 145 | Trimethylamine   | 2   | 13.6 | 2.1468  | 0.4187 | 0.8613 | - | 3  | - | 4  | 2 - 6   | Trimethylaminuria                          | 10 - 300  | 4.25e-03 |
| 146 | Tyramine         | 860 | 0    | -       | -      | -      | - | -  | - | -  | 0       | Dihydropyriminidase deficiency             | > 400     | -        |
| 147 | Uracil           | 8   | 26.3 | 11.4359 | 3.1893 | 0.1877 | - | 20 | - | 22 | 8 - 110 | Argininemia                                | > 100     | 4.67e-03 |
|     |                  |     |      |         |        |        |   |    |   |    |         | Argininosuccinic aciduria                  | 100 - 500 | 4.37e-03 |
|     |                  |     |      |         |        |        |   |    |   |    |         | Dihydropyriminidase deficiency             | 100 - 500 | 4.37e-03 |
|     |                  |     |      |         |        |        |   |    |   |    |         | Dihydropyrimidine Dehydrogenase deficiency | 100 - 150 | 4.37e-03 |
|     |                  |     |      |         |        |        |   |    |   |    |         | Citrullinemia                              | 100 - 700 |          |
|     |                  |     |      |         |        |        |   |    |   |    |         | Ornithine transcarbamylase deficiency      | 100 - 500 | 4.67e-03 |
|     |                  |     |      |         |        |        |   |    |   |    |         | Tyrosinemia type I                         | 100 - 200 | 4.37e-03 |
| 148 | Uridine          | 15  | 0    | -       | -      | -      | - | -  | - | -  | 0       | Ornithine transcarbamylase deficiency      | 5 - 50    | -        |
|     |                  |     |      |         |        |        |   |    |   |    |         | Citrullinemia                              | 5 - 50    | -        |
| 149 | Valine           | 5   | 66.5 | 8.0124  | 2.7203 | 0.1213 | - | 19 | - | 18 | 5 - 24  | Maple Syrup Urine disease                  | 20 - 50   | 6.30e-01 |
|     |                  |     |      |         |        |        |   |    |   |    |         | Hartnup disease                            | 40 - 500  | 4.39e-04 |
| 150 | Xanthurenic acid | 18  | 0    | -       | -      | -      | - | -  | - | -  | 0       | Kynureninase deficiency                    | 50 - 200  | -        |

## References to Table S2

- [1] Bouatra S, Aziat F, Mandal R, Guo AC, Wilson MR, Knox C, et al. The human urine metabolome. *PLoS one*. 2013;8(9):e73076. Epub 2013/09/12. doi: 10.1371/journal.pone.0073076. PubMed PMID: 24023812; PubMed Central PMCID: PMC3762851.
- [2] Pettersen JE, Jellum E. The identification and metabolic origin of 2-furoylglycine and 2,5-furandicarboxylic acid in human urine. *Clinica chimica acta; international journal of clinical chemistry*. 1972;41:199-207. Epub 1972/10/01. doi: 10.1016/0009-8981(72)90512-8. PubMed PMID: 4630229.
- [3] Fothergill JC, Guest JR. Catabolism of L-lysine by *Pseudomonas aeruginosa*. *Journal of general microbiology*. 1977;99(1):139-55. Epub 1977/03/01. doi: 10.1099/00221287-99-1-139. PubMed PMID: 405455.
- [4] Curwin BD, Deddens JA, McKernan LT. Flavoring exposure in food manufacturing. *J Expo Sci Environ Epidemiol*. 2015;25(3):324-33. Epub 07/23. doi: 10.1038/jes.2014.52. PubMed PMID: 25052692.
- [5] Goelzer A, Bekkal Brikci F, Martin-Verstraete I, Noirot P, Bessieres P, Aymerich S, et al. Reconstruction and analysis of the genetic and metabolic regulatory networks of the central metabolism of *Bacillus subtilis*. *BMC systems biology*. 2008;2:20. Epub 2008/02/28. doi: 10.1186/1752-0509-2-20. PubMed PMID: 18302748; PubMed Central PMCID: PMC2311275.
- [6] Navone L, Casati P, Licona-Cassani C, Marcellin E, Nielsen LK, Rodriguez E, et al. Allantoin catabolism influences the production of antibiotics in *Streptomyces coelicolor*. *Applied microbiology and biotechnology*. 2014;98(1):351-60. Epub 2013/12/03. doi: 10.1007/s00253-013-5372-1. PubMed PMID: 24292080.
- [7] Knox C, Law V, Jewison T, Liu P, Ly S, Frolkis A, et al. DrugBank 3.0: a comprehensive resource for 'omics' research on drugs. *Nucleic acids research*. 2011;39(Database issue):D1035-41. Epub 2010/11/10. doi: 10.1093/nar/gkq1126. PubMed PMID: 21059682; PubMed Central PMCID: PMC3013709.
- [8] Beloborodova N, Bairamov I, Olenin A, Shubina V, Teplova V, Fedotcheva N. Effect of phenolic acids of microbial origin on production of reactive oxygen species in mitochondria and neutrophils. *Journal of biomedical science*. 2012;19:89. Epub 2012/10/16. doi: 10.1186/1423-0127-19-89. PubMed PMID: 23061754; PubMed Central PMCID: PMC3503878.
- [9] Duncan SH, Barcenilla A, Stewart CS, Pryde SE, Flint HJ. Acetate utilization and butyryl coenzyme A (CoA):acetate-CoA transferase in butyrate-producing bacteria from the human large intestine. *Applied and environmental microbiology*. 2002;68(10):5186-90. Epub 2002/09/27. doi: 10.1128/aem.68.10.5186-5190.2002. PubMed PMID: 12324374; PubMed Central PMCID: PMC126392.
- [10] Riviere A, Selak M, Lantin D, Leroy F, De Vuyst L. Bifidobacteria and Butyrate-Producing Colon Bacteria: Importance and Strategies for Their Stimulation in the Human Gut. *Frontiers in Microbiology*. 2016;7:979. Epub 2016/07/23. doi: 10.3389/fmicb.2016.00979. PubMed PMID: 27446020; PubMed Central PMCID: PMC4923077.
- [11] Lamarine RJ. Selected health and behavioral effects related to the use of caffeine. *Journal of community health*. 1994;19(6):449-66. Epub 1994/12/01. PubMed PMID: 7844249.
- [12] The Merck Index: An Encyclopedia of Chemicals, Drugs, and Biologicals 1996.
- [13] Kim S, Chen J, Cheng T, Gindulyte A, He J, He S, et al. PubChem 2019 update: improved access to chemical data. *Nucleic acids research*. 2019;47(D1):D1102-D9. doi: 10.1093/nar/gky1033. PubMed PMID: 30371825.
- [14] National Center for Biotechnology Information. PubChem Database <https://pubchem.ncbi.nlm.nih.gov/compound/>.
- [15] Varzakas TL, Athanasios; Anestis, Styliano. Sweeteners: Nutritional Aspects, Applications, and Production Technology 2012.
- [16] Ebner F, Heller A, Rippke F, Tausch I. Topical use of dexpanthenol in skin disorders. *American journal of clinical dermatology*. 2002;3(6):427-33. Epub 2002/07/13. doi: 10.2165/00128071-200203060-00005. PubMed PMID: 12113650.
- [17] Steinhagen WH, Swenberg JA, Barrow CS. Acute inhalation toxicity and sensory irritation of dimethylamine. *American Industrial Hygiene Association journal*. 1982;43(6):411-7. Epub 1982/06/01. doi: 10.1080/15298668291409956. PubMed PMID: 7113921.
- [18] Neurath GB, Dunger M, Pein FG, Ambrosius D, Schreiber O. Primary and secondary amines in the human environment. *Food and cosmetics toxicology*. 1977;15(4):275-82. Epub 1977/08/01. PubMed PMID: 590888.
- [19] Bhuvaneshwar CG, Chang G, Epstein LA, Stern TA. Alcohol use during pregnancy: prevalence and impact. *Prim Care Companion J Clin Psychiatry*. 2007;9(6):455-60. doi: 10.4088/pcc.v09n0608. PubMed PMID: 18185825.
- [20] Liesivuori J, Savolainen H. Methanol and formic acid toxicity: biochemical mechanisms. *Pharmacology & toxicology*. 1991;69(3):157-63. Epub 1991/09/01. PubMed PMID: 1665561.
- [21] Gupta A. To err is Genetics: diagnosis and management of inborn errors of metabolism (IEM). Chapter. 2007;32:415-23.

- [22] Knowles CO. 22.4.2 Benzyl Benzoate in Handbook of Pesticide Toxicology, Volume 3: Classes of Pesticides"1991.
- [23] Vicas IM, Beck R. Fatal inhalational isopropyl alcohol poisoning in a neonate. *Journal of toxicology Clinical toxicology*. 1993;31(3):473-81. Epub 1993/01/01. PubMed PMID: 8355323.
- [24] Yannai S. Dictionary of food compounds with CD-ROM: Additives, flavors, and ingredients.2004.
- [25] Oberholzer VG, Wood CB, Palmer T, Harrison BM. Increased pyroglutamic acid levels in patients on artificial diets. *Clinica chimica acta; international journal of clinical chemistry*. 1975;62(2):299-304. Epub 1975/07/23. doi: 10.1016/0009-8981(75)90240-5. PubMed PMID: 1149292.
- [26] Biff F, Palmer RJA. Metabolic Acidosis In *Comprehensive Clinical Nephrology Fourth Edition* ed.
- [27] A.Seib M-LP. Chemistry of L-ascorbic acid related to foods. *Food Chemistry*. 1988;30(4):289-312.
- [28] Gupta A, Dwivedi M, Mahdi AA, Khetrpal CL, Bhandari M. Broad identification of bacterial type in urinary tract infection using (1)h NMR spectroscopy. *Journal of proteome research*. 2012;11(3):1844-54. Epub 2012/02/02. doi: 10.1021/pr2010692. PubMed PMID: 22292465.
- [29] Megarbane B, Borron SW, Baud FJ. Current recommendations for treatment of severe toxic alcohol poisonings. *Intensive care medicine*. 2005;31(2):189-95. Epub 2005/01/01. doi: 10.1007/s00134-004-2521-0. PubMed PMID: 15627163.
- [30] Boyle L, Wamelink MMC, Salomons GS, Roos B, Pop A, Dauber A, et al. Mutations in TKT Are the Cause of a Syndrome Including Short Stature, Developmental Delay, and Congenital Heart Defects. *American journal of human genetics*. 2016;98(6):1235-42. doi: 10.1016/j.ajhg.2016.03.030. PubMed PMID: 27259054.
- [31] Oxipurinol: alloxanthine, Oxyprim, oxypurinol. *Drugs in R&D*. 2004;5(3):171-5. Epub 2004/05/14. doi: 10.2165/00126839-200405030-00008. PubMed PMID: 15139781.
- [32] Acetaminophen. *Drugs in pregnancy and lactation: a reference guide to fetal and neonatal risk*. h; . 10th ed: Philadelphia: Wolters Kluwer Healt; 2015.
- [33] Jacobs DM, Spiesser L, Garnier M, de Roo N, van Dorsten F, Hollebrands B, et al. SPE-NMR metabolite sub-profiling of urine. *Analytical and bioanalytical chemistry*. 2012;404(8):2349-61. Epub 2012/08/31. doi: 10.1007/s00216-012-6339-2. PubMed PMID: 22932811.
- [34] Atkinson W, Downer P, Lever M, Chambers ST, George PM. Effects of orange juice and proline betaine on glycine betaine and homocysteine in healthy male subjects. *European journal of nutrition*. 2007;46(8):446-52. Epub 2007/12/07. doi: 10.1007/s00394-007-0684-5. PubMed PMID: 18060588.
- [35] Gungal F, Bachmann C. Age-related reference values for urinary organic acids in a healthy Turkish pediatric population. *Clinical Chemistry*. 1994;40(6):862.
- [36] Boto-Ordonez M, Urpi-Sarda M, Queipo-Ortuno MI, Tulipani S, Tinahones FJ, Andres-Lacueva C. High levels of Bifidobacteria are associated with increased levels of anthocyanin microbial metabolites: a randomized clinical trial. *Food & function*. 2014;5(8):1932-8. Epub 2014/06/25. doi: 10.1039/c4fo00029c. PubMed PMID: 24958563.
- [37] Forester SC, Waterhouse AL. Identification of Cabernet Sauvignon anthocyanin gut microflora metabolites. *Journal of agricultural and food chemistry*. 2008;56(19):9299-304. Epub 2008/09/05. doi: 10.1021/jf801309n. PubMed PMID: 18767860.
- [38] Craig WJ, Nguyen TT. Caffeine and Theobromine Levels in Cocoa and Carob Products. *Journal of food Science*. 1984;49(1):302-3.
- [39] G.Fraudienst-Egge, Trefz FK. MetaGene: Metabolic & Genetic Information Center: METAGENE consortium. MetaGene: Metabolic & Genetic Information Center2017. Retrieved on 150819.

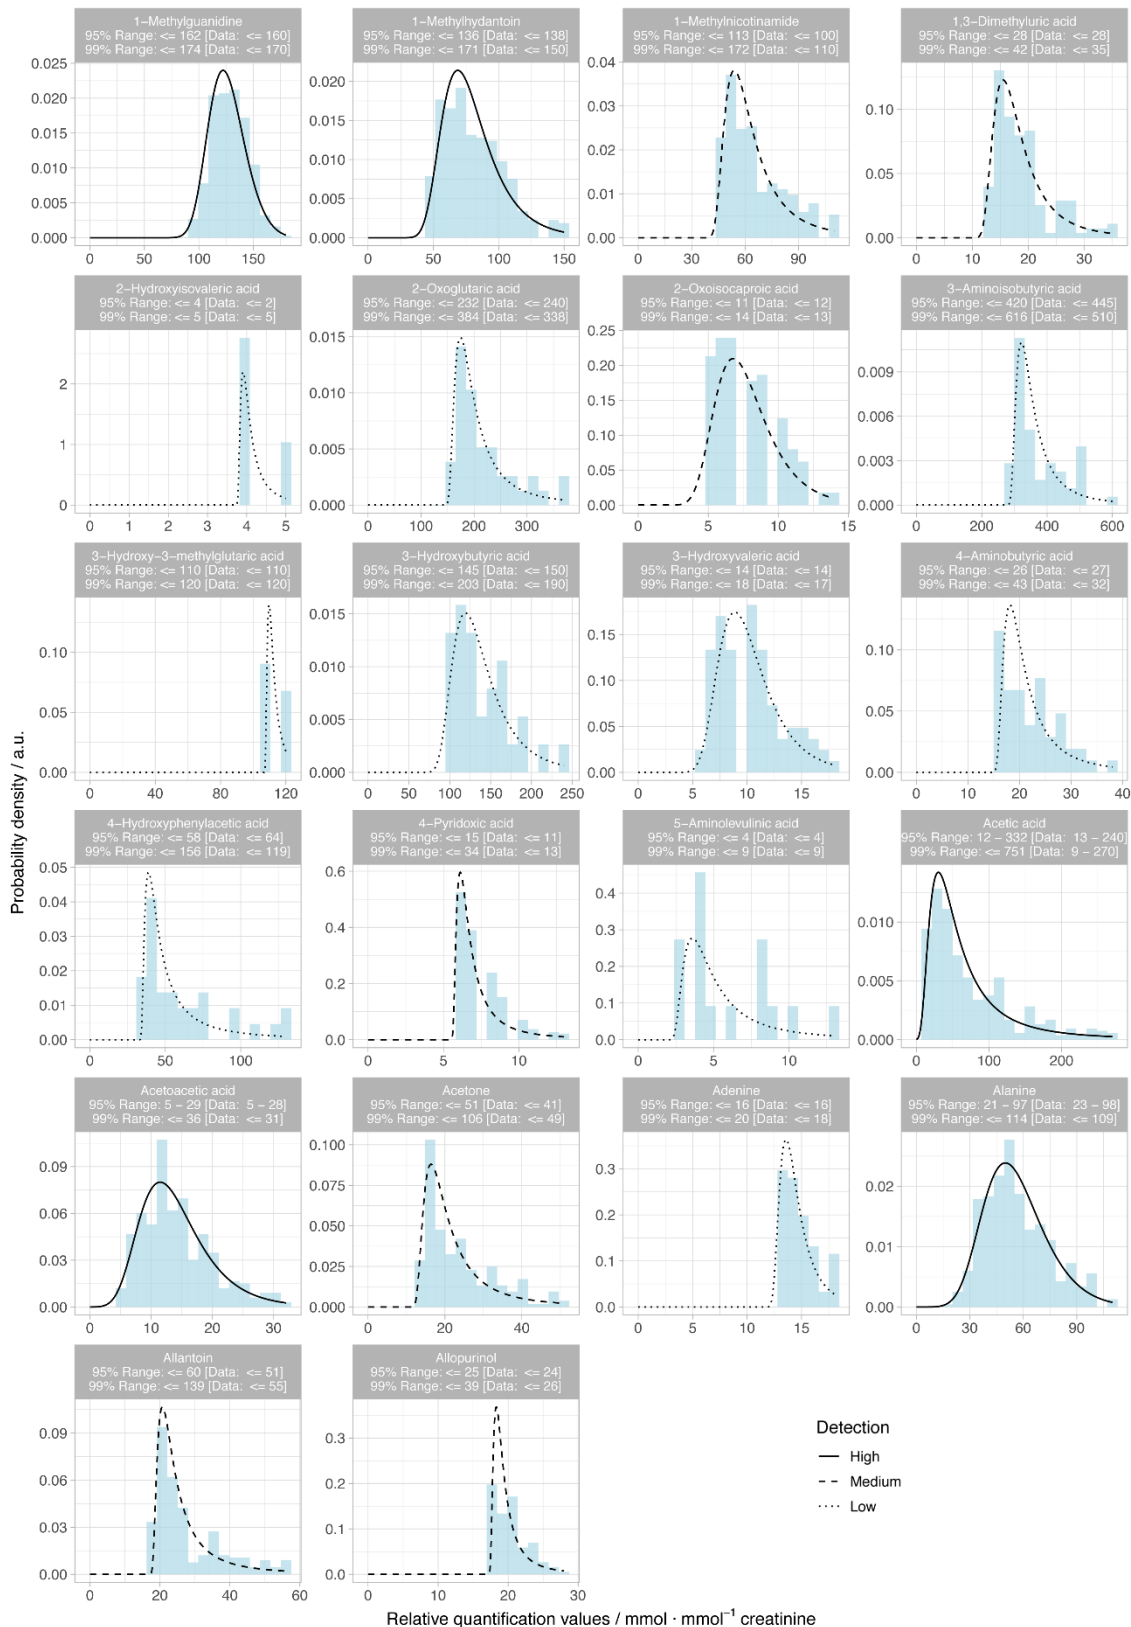

**Figure S4. Distribution of probability densities for 22 out of the 66 metabolites that had a percentage of detection greater or equal 2.5%. They were used to build GEV probabilistic models. Densities calculated from models are represented as black lines with the following legend: dotted for low, dashed for intermediate and solid for high percentage of detection for the metabolite. Light blue bars plot experimental real data, where values below LOD were discarded.**

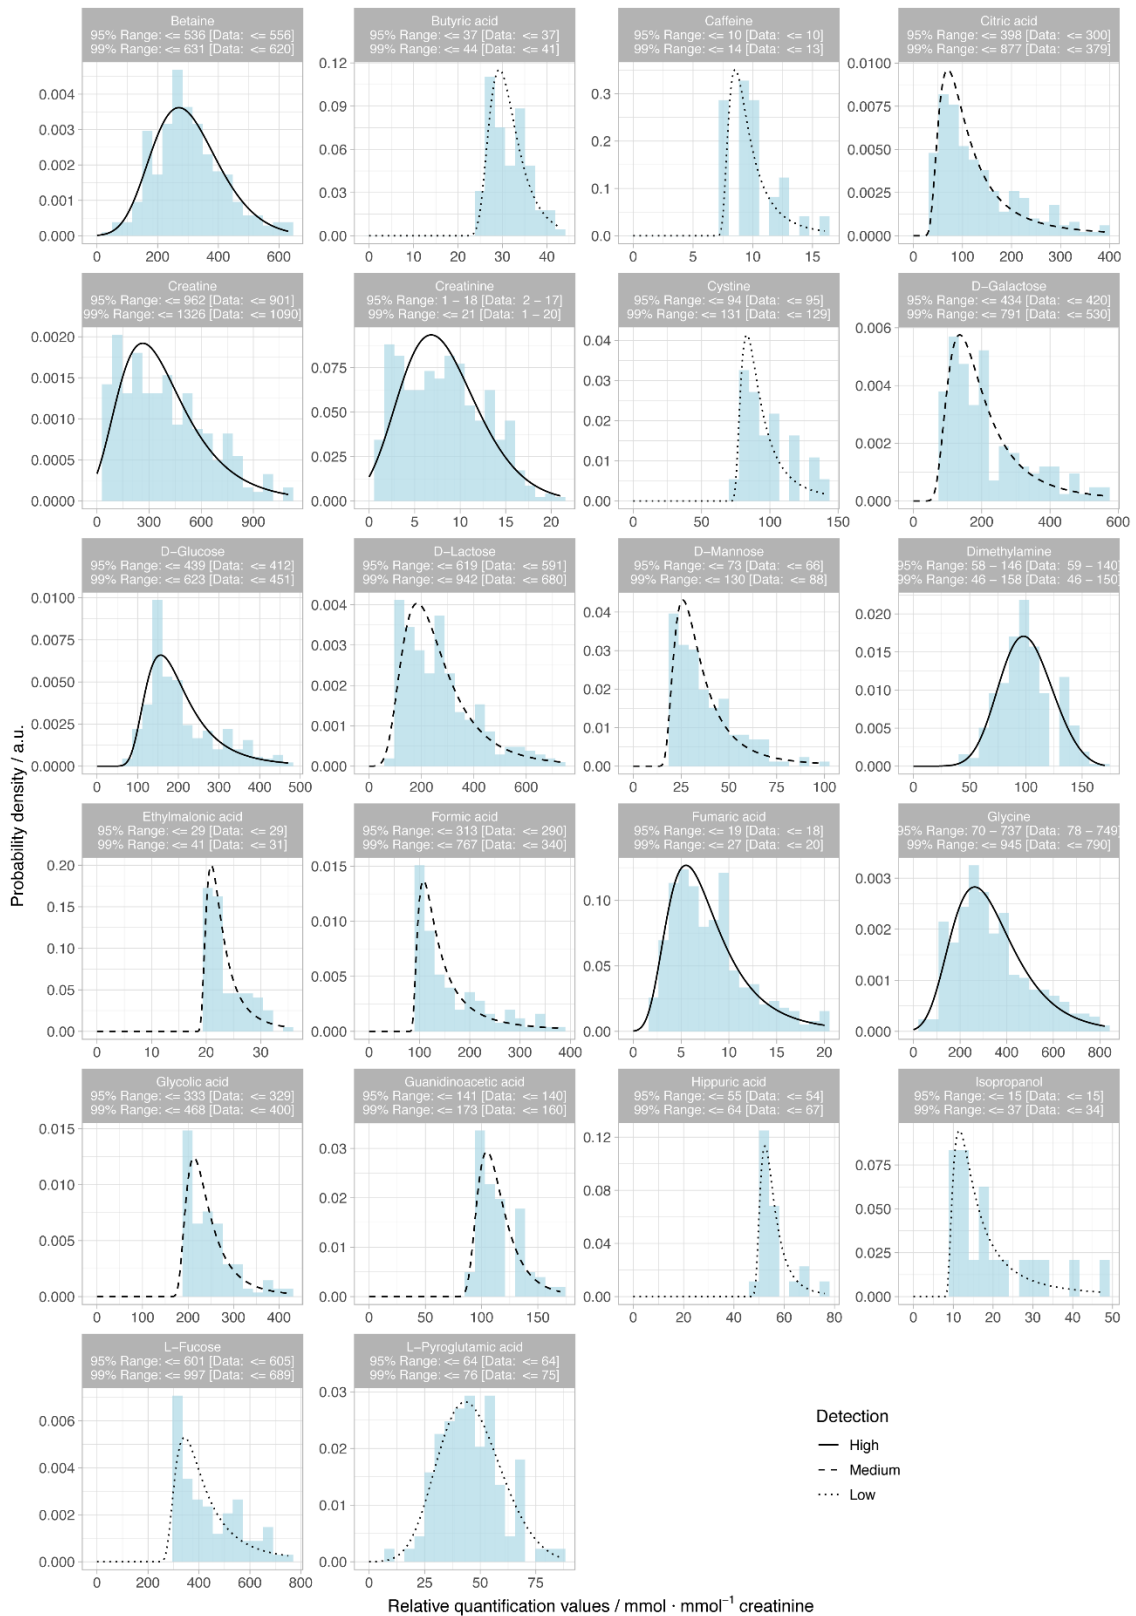

**Figure S5. Distribution of probability densities for 22 out of the 66 metabolites that had a percentage of detection greater or equal 2.5%. They were used to build GEV probabilistic models. Densities calculated from models are represented as black lines with the following legend: dotted for low, dashed for intermediate and solid for high percentage of detection for the metabolite. Light blue bars plot experimental real data, where values below LOD were discarded.**



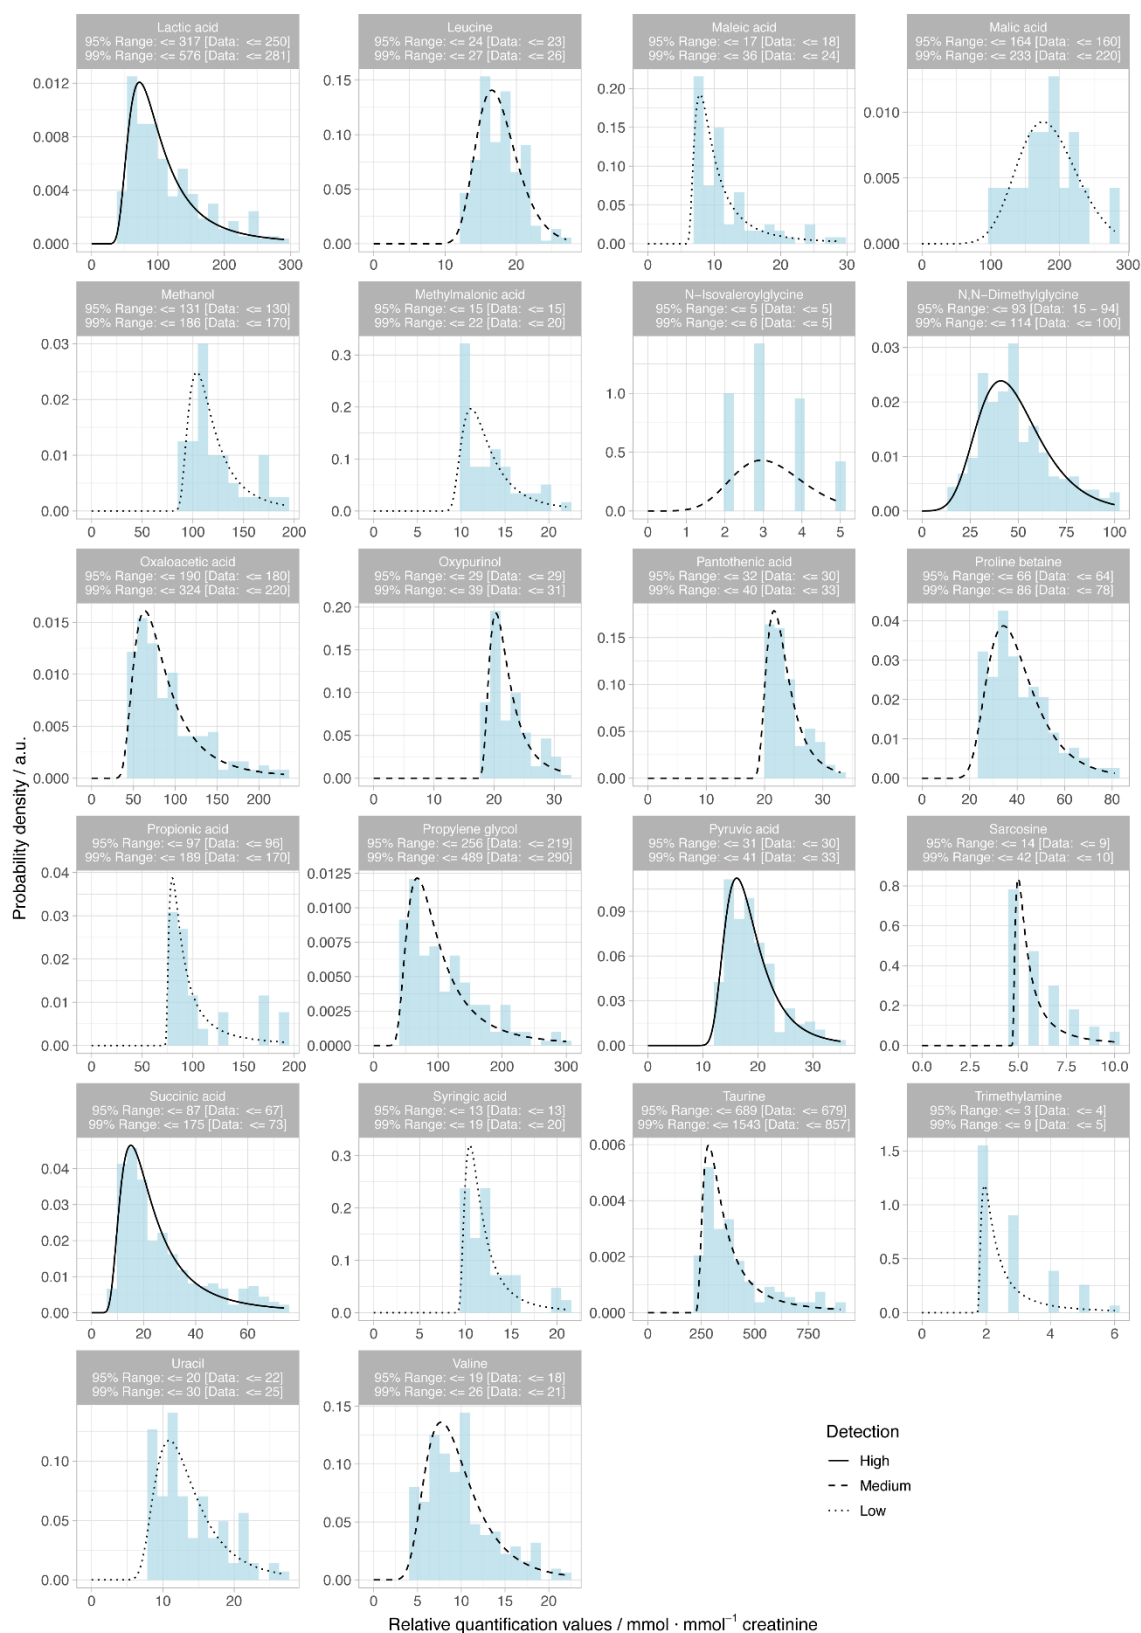

**Figure S6. Distribution of probability densities for 22 out of the 66 metabolites that had a percentage of detection greater or equal 2.5%. They were used to build GEV probabilistic models. Densities calculated from models are represented as black lines with the following legend: dotted for low, dashed for intermediate and solid for high percentage of detection for the metabolite. Light blue bars plot experimental real data, where values below LOD were discarded**
